# Supplementary material
Source: PubMed Central journal article supplement (PMC7190915)
Supplement: jci-130-131126-s067.pdf [file jci-130-131126-s067.pdf]

## Supplemental Information for

### Chronic mirabegron treatment increases human brown fat, HDL cholesterol, and insulin sensitivity

Alana E. O'Mara<sup>1,8</sup>, James W. Johnson<sup>1,8</sup>, Joyce D. Linderman<sup>1</sup>, Robert J. Brychta<sup>1</sup>,  
Suzanne McGehee<sup>1</sup>, Laura A. Fletcher<sup>1</sup>, Yael A. Fink<sup>1</sup>, Devika Kapuria<sup>2</sup>, Thomas M.  
Cassimatis<sup>1</sup>, Nathan Kelsey<sup>1</sup>, Cheryl Cero<sup>1</sup>, Zahraa Abdul-Sater<sup>1</sup>, Francesca Piccinini<sup>3</sup>,  
Alison S. Baskin<sup>1</sup>, Brooks P. Leitner<sup>1</sup>, Hongyi Cai<sup>4</sup>, Corina M. Millo<sup>5</sup>, William Dieckmann<sup>5</sup>,  
Mary Walter<sup>6</sup>, Norman B. Javitt<sup>7</sup>, Yaron Rotman<sup>2</sup>, Peter J. Walter<sup>4</sup>, Marilyn Ader<sup>3</sup>,  
Richard N. Bergman<sup>3</sup>, Peter Herscovitch<sup>5</sup>, Kong Y. Chen<sup>1</sup>, Aaron M. Cypess<sup>1,\*</sup>

<sup>1</sup>Diabetes, Endocrinology, and Obesity Branch, Intramural Research Program, National Institute of Diabetes and Digestive and Kidney Diseases, National Institutes of Health, Bethesda, MD 20892, USA

<sup>2</sup>Liver Diseases Branch, National Institute of Diabetes and Digestive and Kidney Diseases, National Institutes of Health, Bethesda, MD 20892, USA

<sup>3</sup>Diabetes and Obesity Research Institute, Cedars-Sinai Medical Center, Los Angeles, CA, 90048

<sup>4</sup>Clinical Mass Spectrometry Core, National Institute of Diabetes and Digestive and Kidney Diseases, National Institutes of Health, Bethesda, MD 20892, USA

<sup>5</sup>Positron Emission Tomography Department, National Institutes of Health, Bethesda, MD 20892, USA.

<sup>6</sup>Clinical Laboratory Core, National Institute of Diabetes and Digestive Kidney Diseases, National Institutes of Health, Bethesda, MD 20892, USA

<sup>7</sup>Departments of Medicine and Pediatrics, NYU School of Medicine, New York, NY 10016

<sup>8</sup>Shared contribution\*

To whom correspondence should be addressed. Email: [aaron.cypess@nih.gov](mailto:aaron.cypess@nih.gov)

**Contents: Supplemental Tables = 13, Figures = 8**

**Supplemental Table 1. Mirabegron Pharmacokinetic Parameters**

| <b>Pharmacokinetic Measure<br/>(Units)</b>                                                                                                                                                                                          | <b>Day 1</b>   | <b>Day 28</b>  | <b>P Value</b> |
|-------------------------------------------------------------------------------------------------------------------------------------------------------------------------------------------------------------------------------------|----------------|----------------|----------------|
| $C_{\max}^A$ (nM)                                                                                                                                                                                                                   | 184 ± 27       | 305 ± 45       | 0.02           |
| $t_{\max}^B$ (min)                                                                                                                                                                                                                  | 180 (120-300)  | 210 (60-300)   | 0.94           |
| $AUC_{0-300}^C$ (nM*min)                                                                                                                                                                                                            | 23,719 ± 3,229 | 45,342 ± 5,719 | 0.001          |
| <b>Trough Levels (nM)<sup>D</sup></b>                                                                                                                                                                                               |                |                |                |
| Day 14                                                                                                                                                                                                                              | 40.3 ± 5.0     |                |                |
| Day 28                                                                                                                                                                                                                              | 45.2 ± 4.5     |                |                |
| 16 days after cessation                                                                                                                                                                                                             | 5.4 ± 0.1      |                |                |
| <sup>A</sup> Mean ± SEM;<br><sup>B</sup> Median (Range);<br><sup>C</sup> AUC from time of oral dose administration to PET/CT scan, reported as mean ± SEM;<br><sup>D</sup> n=14 for Days 14 and 28; n=6 for 16 days after cessation |                |                |                |

## Supplemental Table 2. Parameters of the Repeated-Measures ANOVA for REE

### Summary of Fit and Parameter Estimates

|                        |       |           |          |           |                                |         |
|------------------------|-------|-----------|----------|-----------|--------------------------------|---------|
| RSquare Adj            | 0.87  | Term      | Estimate | Std Error | denominator degrees of freedom | Prob> t |
| Root Mean Square Error | 3.22  | Intercept | 62.76    | 1.92      | 13                             | <0.001  |
| Mean of Response       | 62.76 | Day       | -0.23    | 0.43      | 39                             | 0.59    |
|                        |       | Time      | -1.71    | 0.43      | 39                             | <0.001  |
|                        |       | Day*Time  | -1.47    | 0.43      | 39                             | 0.001   |

### Least Squares Means Table for Fixed and Random Effects

| Effect   | Level        | Least Sq Mean | Std Error | Lower 95% | Upper 95% |
|----------|--------------|---------------|-----------|-----------|-----------|
| Day      | Day 1        | 62.52         | 1.97      | 58.31     | 66.74     |
| Day      | Day 28       | 62.99         | 1.97      | 58.78     | 67.20     |
| Time     | 8:00         | 61.04         | 1.97      | 56.83     | 65.26     |
| Time     | 13:00        | 64.47         | 1.97      | 60.26     | 68.68     |
| Day*Time | Day 1,08:00  | 59.34         | 2.06      | 54.99     | 63.68     |
| Day*Time | Day 1,13:00  | 65.71         | 2.06      | 61.37     | 70.06     |
| Day*Time | Day 28,08:00 | 62.75         | 2.06      | 58.41     | 67.10     |
| Day*Time | Day 28,13:00 | 63.23         | 2.06      | 58.89     | 67.58     |
| ID       | 1            | 68.26         | 1.57      | 65.09     | 71.43     |
| ID       | 2            | 61.06         | 1.57      | 57.90     | 64.23     |
| ID       | 3            | 56.32         | 1.57      | 53.15     | 59.49     |
| ID       | 4            | 56.68         | 1.57      | 53.51     | 59.84     |
| ID       | 5            | 64.23         | 1.57      | 61.06     | 67.40     |
| ID       | 6            | 59.82         | 1.57      | 56.66     | 62.99     |
| ID       | 7            | 68.42         | 1.57      | 65.25     | 71.58     |
| ID       | 8            | 56.50         | 1.57      | 53.34     | 59.67     |
| ID       | 9            | 67.86         | 1.57      | 64.69     | 71.03     |
| ID       | 10           | 58.10         | 1.57      | 54.93     | 61.27     |
| ID       | 11           | 65.21         | 1.57      | 62.04     | 68.38     |
| ID       | 12           | 55.72         | 1.57      | 52.55     | 58.89     |
| ID       | 13           | 80.16         | 1.57      | 76.99     | 83.33     |
| ID       | 14           | 60.27         | 1.57      | 57.10     | 63.43     |

### Least Squares Means Differences, Student's *t*

| Effect   | Level        | - Level      | Difference | Std Err Dif | Lower CL | Upper CL | P Value |
|----------|--------------|--------------|------------|-------------|----------|----------|---------|
| Day*Time | Day 1,13:00  | Day 1,08:00  | 6.38       | 1.22        | 3.92     | 8.84     | <0.001  |
| Day*Time | Day 28,13:00 | Day 1,08:00  | 3.90       | 1.22        | 1.44     | 6.35     | 0.003   |
| Day*Time | Day 28,08:00 | Day 1,08:00  | 3.42       | 1.22        | 0.96     | 5.87     | 0.01    |
| Day*Time | Day 1,13:00  | Day 28,08:00 | 2.96       | 1.22        | 0.50     | 5.42     | 0.02    |
| Day*Time | Day 1,13:00  | Day 28,13:00 | 2.48       | 1.22        | 0.02     | 4.94     | 0.05    |
| Day*Time | Day 28,13:00 | Day 28,08:00 | 0.48       | 1.22        | -1.98    | 2.94     | 0.70    |

# Supplemental Table 3. Parameters of the Repeated-Measures ANOVA for RQ

## Summary of Fit and Parameter Estimates

|                        |       |           |          |           |                                |         |
|------------------------|-------|-----------|----------|-----------|--------------------------------|---------|
| RSquare Adj            | 0.82  | Term      | Estimate | Std Error | denominator degrees of freedom | Prob> t |
| Root Mean Square Error | 0.018 | Intercept | 0.8094   | 0.0049    | 13                             | <0.001  |
| Mean of Response       | 0.809 | Day       | 0.0004   | 0.0024    | 39                             | 0.88    |
|                        |       | Time      | 0.0301   | 0.0024    | 39                             | <0.001  |
|                        |       | Day*Time  | 0.0046   | 0.0024    | 39                             | 0.06    |

## Least Squares Means Table for Fixed and Random Effects

| Effect   | Level        | Least Sq Mean | Std Error | Lower 95% | Upper 95% |
|----------|--------------|---------------|-----------|-----------|-----------|
| Day      | Day 1        | 0.810         | 0.0054    | 0.798     | 0.821     |
| Day      | Day 28       | 0.809         | 0.0054    | 0.798     | 0.820     |
| Time     | 8:00         | 0.840         | 0.0054    | 0.828     | 0.851     |
| Time     | 13:00        | 0.779         | 0.0054    | 0.768     | 0.791     |
| Day*Time | Day 1,08:00  | 0.845         | 0.0064    | 0.831     | 0.858     |
| Day*Time | Day 1,13:00  | 0.775         | 0.0064    | 0.762     | 0.788     |
| Day*Time | Day 28,08:00 | 0.835         | 0.0064    | 0.822     | 0.848     |
| Day*Time | Day 28,13:00 | 0.784         | 0.0064    | 0.771     | 0.797     |
| ID       | 1            | 0.797         | 0.0079    | 0.781     | 0.813     |
| ID       | 2            | 0.799         | 0.0079    | 0.783     | 0.814     |
| ID       | 3            | 0.788         | 0.0079    | 0.772     | 0.804     |
| ID       | 4            | 0.811         | 0.0079    | 0.796     | 0.827     |
| ID       | 5            | 0.821         | 0.0079    | 0.805     | 0.836     |
| ID       | 6            | 0.821         | 0.0079    | 0.805     | 0.836     |
| ID       | 7            | 0.793         | 0.0079    | 0.777     | 0.809     |
| ID       | 8            | 0.831         | 0.0079    | 0.815     | 0.847     |
| ID       | 9            | 0.806         | 0.0079    | 0.790     | 0.822     |
| ID       | 10           | 0.799         | 0.0079    | 0.783     | 0.815     |
| ID       | 11           | 0.822         | 0.0079    | 0.806     | 0.837     |
| ID       | 12           | 0.806         | 0.0079    | 0.790     | 0.822     |
| ID       | 13           | 0.830         | 0.0079    | 0.815     | 0.846     |
| ID       | 14           | 0.809         | 0.0079    | 0.793     | 0.825     |

## Least Squares Means Differences, Student's *t*

| Effect   | Level        | - Level      | Difference | Std Err Dif | Lower CL | Upper CL | P Value |
|----------|--------------|--------------|------------|-------------|----------|----------|---------|
| Day*Time | Day 1,08:00  | Day 1,13:00  | 0.0694     | 0.0068      | 0.0557   | 0.0832   | <0.001  |
| Day*Time | Day 1,08:00  | Day 28,13:00 | 0.0609     | 0.0068      | 0.0472   | 0.0747   | <0.001  |
| Day*Time | Day 28,08:00 | Day 1,13:00  | 0.0595     | 0.0068      | 0.0458   | 0.0732   | <0.001  |
| Day*Time | Day 28,08:00 | Day 28,13:00 | 0.0510     | 0.0068      | 0.0373   | 0.0647   | <0.001  |
| Day*Time | Day 1,08:00  | Day 28,08:00 | 0.0099     | 0.0068      | -0.0038  | 0.0237   | 0.15    |
| Day*Time | Day 28,13:00 | Day 1,13:00  | 0.0085     | 0.0068      | -0.0052  | 0.0222   | 0.22    |

## Supplemental Table 4. Cardiovascular Parameters

|                                               | Day 1                                                                          | Day 28                                                                        | Change <sup>C</sup>                                         |
|-----------------------------------------------|--------------------------------------------------------------------------------|-------------------------------------------------------------------------------|-------------------------------------------------------------|
| Heart Rate <sup>A</sup> (bpm)                 | 08:00: 75.8 ± 2.5<br>13:00: 82.2 ± 2.8<br><br>+6.4 ± 2.3<br><i>P</i> = 0.02    | 08:00: 85.3 ± 2.0<br>13:00: 84.8 ± 2.8<br><br>-0.6 ± 1.3<br><i>P</i> = 0.68   | <i>P</i> < 0.001<br><i>P</i> = 0.13<br><br><i>P</i> = 0.01  |
| Systolic Blood Pressure <sup>B</sup> (mmHg)   | 08:00: 111.6 ± 2.3<br>13:00: 119.8 ± 2.7<br><br>+8.2 ± 2.5<br><i>P</i> = 0.006 | 08:00: 114.5 ± 1.9<br>13:00: 115.4 ± 2.9<br><br>+0.9 ± 2.4<br><i>P</i> = 0.72 | <i>P</i> = 0.26<br><i>P</i> = 0.06<br><br><i>P</i> = 0.04   |
| Diastolic Blood Pressure <sup>B</sup> (mmHg)  | 08:00: 67.0 ± 2.2<br>13:00: 68.9 ± 2.2<br><br>+ 1.9 ± 1.0<br><i>P</i> = 0.08   | 08:00: 70.4 ± 2.3<br>13:00: 70.6 ± 1.7<br><br>+0.2 ± 1.3<br><i>P</i> = 0.89   | <i>P</i> = 0.06<br><i>P</i> = 0.21<br><br><i>P</i> = 0.25   |
| Rate Pressure Product <sup>D</sup> (mmHg*bpm) | 08:00: 8461 ± 319<br>13:00: 9890 ± 493<br><br>+1429 ± 441<br><i>P</i> = 0.006  | 08:00: 9774 ± 292<br>13:00: 9780 ± 403<br><br>+6 ± 254<br><i>P</i> = 0.98     | <i>P</i> < 0.001<br><i>P</i> = 0.73<br><br><i>P</i> = 0.008 |

| Guide       |                                                                |                                                                 |                                                                                                                                                  |
|-------------|----------------------------------------------------------------|-----------------------------------------------------------------|--------------------------------------------------------------------------------------------------------------------------------------------------|
| Measurement | Difference on Day 1<br>08:00 and 13:00<br><br><i>P</i> -value: | Difference on Day 28<br>08:00 and 13:00<br><br><i>P</i> -value: | <i>P</i> : Difference in 08:00 values<br><i>P</i> : Difference in 13:00 values<br><br><i>P</i> : Difference of change Day 1<br>vs. change Day 28 |

<sup>A</sup>Mean measurement taken continuously over a 20-minute period

<sup>B</sup>Mean measurement taken in triplicate over a 20-minute period

<sup>C</sup>Paired Student's *t*-tests.

<sup>D</sup>Rate Pressure Product = (Heart Rate) \* (Systolic Blood Pressure)

## Supplemental Table 5. Blood Levels of Common Metabolites and Hormones

| Metabolite (units)            | Day 1 at 08:00 <sup>A</sup> | $\Delta$ Day 1 <sup>B</sup> | <i>P</i> value | Day 28 at 08:00 <sup>A</sup> | $\Delta$ Day 28 <sup>B</sup> | <i>P</i> value | $\Delta$ 8:00-8:00 <i>P</i> Value <sup>C</sup> |
|-------------------------------|-----------------------------|-----------------------------|----------------|------------------------------|------------------------------|----------------|------------------------------------------------|
| Glucose (mg/dL)               | 88 $\pm$ 2                  | -4 $\pm$ 2                  | 0.06           | 89 $\pm$ 1                   | -5 $\pm$ 1                   | 0.001          | 0.42                                           |
| Insulin ( $\mu$ U/mL)         | 10.3 $\pm$ 0.9              | -0.6 $\pm$ 0.6              | 0.24           | 11.8 $\pm$ 1.1               | -3.1 $\pm$ 0.9               | 0.006          | 0.15                                           |
| NEFA (mEq/L)                  | 0.37 $\pm$ 0.02             | +0.54 $\pm$ 0.04            | <0.001         | 0.36 $\pm$ 0.03              | +0.30 $\pm$ 0.04             | <0.001         | 0.60                                           |
| $\beta$ -hydroxybutyrate (mM) | 0.03 $\pm$ 0.01             | +0.27 $\pm$ 0.07            | 0.002          | 0.04 $\pm$ 0.01              | +0.08 $\pm$ 0.03             | 0.02           | 0.44                                           |
| Lactate (mmol/L)              | 0.9 $\pm$ 0.1               | +0.2 $\pm$ 0.1              | 0.20           | 0.8 $\pm$ 0.1                | -0.1 $\pm$ 0.1               | 0.46           | 0.29                                           |
| Pyruvate (mg/dL)              | 0.9 $\pm$ 0.1               | -0.1 $\pm$ 0.1              | 0.46           | 0.9 $\pm$ 0.1                | -0.2 $\pm$ 0.1               | 0.16           | 0.28                                           |
| Total bile acids ( $\mu$ M)   | 2.99 $\pm$ 0.39             | -2.13 $\pm$ 0.45            | 0.001          | 4.46 $\pm$ 0.80              | -2.82 $\pm$ 0.64             | 0.001          | 0.042                                          |
| FGF19 (pg/mL)                 | 118 $\pm$ 22                | -62 $\pm$ 19                | 0.006          | 119 $\pm$ 20                 | -45 $\pm$ 20                 | 0.037          | 0.97                                           |
| Norepinephrine (pg/mL)        | 263 $\pm$ 26                | +57 $\pm$ 23                | 0.03           | 231 $\pm$ 12                 | +107 $\pm$ 48                | 0.047          | 0.27                                           |
| Epinephrine (pg/mL)           | 20 $\pm$ 3                  | +4 $\pm$ 6                  | 0.58           | 20 $\pm$ 4                   | +0 $\pm$ 3                   | 0.91           | 0.73                                           |
| Dopamine (pg/mL)              | 13 $\pm$ 1                  | -1 $\pm$ 1                  | 0.34           | 13 $\pm$ 0                   | +2 $\pm$ 2                   | 0.17           | 0.34                                           |
| T3, total (ng/dL)             | 110.4 $\pm$ 7.3             | -1.4 $\pm$ 1.2              | 0.25           | 115.4 $\pm$ 8.3              | -2.8 $\pm$ 1.5               | 0.09           | 0.25                                           |
| T4, free (ng/dL)              | 1.1 $\pm$ 0.0               | +0.1 $\pm$ 0.0              | 0.014          | 1.2 $\pm$ 0.0                | +0.0 $\pm$ 0.0               | 0.05           | 0.17                                           |
| TSH ( $\mu$ U/mL)             | 1.59 $\pm$ 0.24             | -0.34 $\pm$ 0.11            | 0.009          | 1.98 $\pm$ 0.48              | -0.58 $\pm$ 0.27             | 0.047          | 0.19                                           |
| Total Protein (g/dL)          | 6.6 $\pm$ 0.3               | +0.3 $\pm$ 0.1              | 0.013          | 6.8 $\pm$ 0.1                | +0.2 $\pm$ 0.1               | 0.004          | 0.44                                           |
| Creatine Kinase (U/L)         | 79.0 $\pm$ 18.4             | -3.5 $\pm$ 4.5              | 0.98           | 78.8 $\pm$ 14.6              | -3.2 $\pm$ 3.1               | 0.33           | 0.99                                           |
| Growth Hormone (ng/mL)        | 1.67 $\pm$ 0.53             | -1.05 $\pm$ 0.72            | 0.18           | 1.16 $\pm$ 0.71              | -0.54 $\pm$ 0.62             | 0.40           | 0.37                                           |
| Glucagon (pmol/L)             | 24.8 $\pm$ 2.1              | -1.9 $\pm$ 3.7              | 0.62           | 29.1 $\pm$ 2.5               | -8.1 $\pm$ 2.7               | 0.012          | 0.20                                           |
| Cortisol ( $\mu$ g/dL)        | 13.6 $\pm$ 1.3              | -6.1 $\pm$ 1.0              | <0.001         | 13.1 $\pm$ 1.3               | -6.1 $\pm$ 1.4               | 0.001          | 0.61                                           |
| ACTH (pg/mL)                  | 22.9 $\pm$ 4.9              | -8.0 $\pm$ 4.4              | 0.09           | 26.1 $\pm$ 4.2               | -11.0 $\pm$ 3.9              | 0.015          | 0.55                                           |
| PTH (pg/mL)                   | 36.5 $\pm$ 3.0              | +2.7 $\pm$ 1.6              | 0.11           | 35.3 $\pm$ 2.9               | +2.9 $\pm$ 2.1               | 0.20           | 0.55                                           |
| Ghrelin (pg/mL)               | 234 $\pm$ 45                | +4 $\pm$ 28                 | 0.89           | 316 $\pm$ 55                 | +98 $\pm$ 105                | 0.37           | 0.07                                           |
| Leptin (ng/mL)                | 15.1 $\pm$ 2.1              | -3.0 $\pm$ 0.9              | 0.004          | 17.2 $\pm$ 2.3               | -4.1 $\pm$ 0.6               | <0.001         | 0.07                                           |
| Adiponectin ( $\mu$ g/mL)     | 8.56 $\pm$ 1.16             | +0.63 $\pm$ 0.23            | 0.015          | 11.56 $\pm$ 1.57             | +0.25 $\pm$ 0.17             | 0.18           | 0.001                                          |
| FGF21 (pg/mL)                 | 701 $\pm$ 186               | +141 $\pm$ 176              | 0.44           | 819 $\pm$ 234                | -295 $\pm$ 98                | 0.01           | 0.15                                           |
| PYY (pg/mL)                   | 54.6 $\pm$ 7.1              | -27.1 $\pm$ 5.2             | <0.001         | 59.2 $\pm$ 8.9               | -28.4 $\pm$ 6.8              | 0.001          | 0.58                                           |
| aGLP-1 (pg/mL)                | 1.35 $\pm$ 0.21             | -0.84 $\pm$ 0.21            | 0.001          | 1.67 $\pm$ 0.29              | -0.96 $\pm$ 0.25             | 0.002          | 0.22                                           |
| aGIP (pg/mL)                  | 9.1 $\pm$ 1.7               | -2.6 $\pm$ 1.7              | 0.16           | 13.9 $\pm$ 3.0               | -5.8 $\pm$ 3.4               | 0.11           | 0.07                                           |
| tGIP (pg/mL)                  | 34.2 $\pm$ 4.2              | -9.0 $\pm$ 2.7              | 0.005          | 44.8 $\pm$ 5.5               | -17.5 $\pm$ 5.7              | 0.009          | 0.026                                          |
| Total Cholesterol (mg/dL)     | 162.8 $\pm$ 7.5             | +3.3 $\pm$ 4.3              | 0.46           | 169.4 $\pm$ 8.0              | -2.4 $\pm$ 4.2               | 0.58           | 0.11                                           |
| Triglycerides (mg/dL)         | 87.3 $\pm$ 7.3              | +3.2 $\pm$ 3.9              | 0.43           | 86.0 $\pm$ 7.9               | -4.4 $\pm$ 3.5               | 0.23           | 0.72                                           |
| HDL-C (mg/dL)                 | 63.6 $\pm$ 5.6              | -0.3 $\pm$ 1.7              | 0.87           | 69.0 $\pm$ 5.9               | -1.0 $\pm$ 1.7               | 0.56           | 0.001                                          |
| ApoA1 (ug/mL)                 | 965 $\pm$ 93                | +48 $\pm$ 36                | 0.21           | 1075 $\pm$ 110               | +51 $\pm$ 29                 | 0.099          | 0.017                                          |
| ApoE (ug/mL)                  | 78.1 $\pm$ 14.9             | +7.3 $\pm$ 2.0              | 0.003          | 83.5 $\pm$ 15.8              | +2.9 $\pm$ 2.6               | 0.28           | 0.029                                          |
| LDL-C (mg/dL)                 | 81.7 $\pm$ 5.1              | +3.0 $\pm$ 2.4              | 0.23           | 83.2 $\pm$ 5.5               | -0.5 $\pm$ 2.5               | 0.83           | 0.66                                           |
| ApoB100 ( $\mu$ g/mL)         | 64.4 $\pm$ 3.5              | +3.0 $\pm$ 1.2              | 0.027          | 61.5 $\pm$ 3.7               | +2.7 $\pm$ 0.7               | 0.002          | 0.09                                           |
| ApoB100/ApoA1                 | 1.42 $\pm$ 0.22             | -0.02 $\pm$ 0.05            | 0.75           | 1.20 $\pm$ 0.18              | +0.03 $\pm$ 0.05             | 0.62           | 0.003                                          |
| ApoC3 ( $\mu$ g/mL)           | 243 $\pm$ 23                | +5 $\pm$ 8                  | 0.52           | 268 $\pm$ 22                 | +2 $\pm$ 10                  | 0.82           | 0.09                                           |

<sup>A</sup>Baseline values are shown in "Day 1 8:00" and "Day 28 8:00". Values represent mean  $\pm$  SEM

<sup>B</sup>" $\Delta$  Day 1" and " $\Delta$  Day 28" represent changes in 8:00 to 13:00 values during Day 1 and Day 28, respectively

<sup>C</sup>*P* values based of paired Student's *t*-test. The  $\Delta$  8:00-8:00 *P* values lower than the Benjamini-Hochberg critical value are shaded gray

# Supplemental Table 6. Blood Levels of Common Metabolites and Hormones

1 of 3

| Metabolite (units)        | Day 1                                                                       | Day 28                                                                      | Change                                             |
|---------------------------|-----------------------------------------------------------------------------|-----------------------------------------------------------------------------|----------------------------------------------------|
| Glucose (mg/dL)           | 08:00: 87.6 ± 1.9<br>13:00: 83.1 ± 1.4<br>-4.4 ± 2.1<br>P = 0.06            | 08:00: 89.2 ± 1.1<br>13:00: 84.5 ± 1.3<br>-4.7 ± 1.1<br>P = 0.001           | P = 0.42<br>P = 0.27<br><br>P = 0.92               |
| Insulin (μU/mL)           | 08:00: 10.3 ± 0.9<br>13:00: 9.9 ± 0.8<br>-0.6 ± 0.6<br>P = 0.24             | 08:00: 11.8 ± 1.1<br>13:00: 8.2 ± 0.8<br>-3.1 ± 0.9<br>P = 0.006            | P = 0.15<br>P = 0.34<br><br><b>P=0.02</b>          |
| NEFA (mEq/L)              | 08:00: 0.37 ± 0.02<br>13:00: 0.90 ± 0.05<br>+0.54 ± 0.04<br>P < 0.001       | 08:00: 0.36 ± 0.03<br>13:00: 0.65 ± 0.04<br>+0.30 ± 0.04<br>P < 0.001       | P = 0.60<br>P < 0.001<br><br><b>P &lt; 0.001</b>   |
| β-hydroxybutyrate (mM)    | 08:00: 0.029 ± 0.010<br>13:00: 0.291 ± 0.069<br>+0.274 ± 0.069<br>P = 0.002 | 08:00: 0.041 ± 0.007<br>13:00: 0.122 ± 0.029<br>+0.081 ± 0.030<br>P = 0.021 | P = 0.44<br>P = 0.006<br><br><b>P=0.002</b>        |
| Lactate (mmol/L)          | 08:00: 0.93 ± 0.09<br>13:00: 1.12 ± 0.13<br>+0.19 ± 0.14<br>P = 0.20        | 08:00: 0.84 ± 0.06<br>13:00: 0.79 ± 0.04<br>-0.05 ± 0.07<br>P = 0.46        | P = 0.29<br>P = 0.008<br><br>P = 0.08              |
| Pyruvate (mg/dL)          | 08:00: 0.94 ± 0.05<br>13:00: 0.89 ± 0.04<br>-0.11 ± 0.09<br>P = 0.46        | 08:00: 0.87 ± 0.06<br>13:00: 0.74 ± 0.05<br>-0.24 ± 0.10<br>P = 0.16        | P = 0.28<br>P = 0.22<br><br>P=0.43                 |
| Total bile acids (μmol/L) | 08:00: 2.99 ± 0.39<br>13:00: 0.91 ± 0.13<br>-2.13 ± 0.45<br>P = 0.001       | 08:00: 4.46 ± 0.80<br>13:00: 1.64 ± 0.32<br>-2.82 ± 0.64<br>P = 0.001       | <b>P = 0.04</b><br>P = 0.04<br><br><b>P = 0.48</b> |
| FGF19 (pg/mL)             | 08:00: 118.2 ± 22.5<br>13:00: 56.6 ± 6.6<br>-61.6 ± 18.7<br>P = 0.006       | 08:00: 119.2 ± 19.5<br>13:00: 73.9 ± 10.0<br>-45.3 ± 19.5<br>P = 0.04       | P = 0.97<br>P = 0.15<br><br>P = 0.57               |
| Norepinephrine (pg/mL)    | 08:00: 263 ± 26<br>13:00: 323 ± 34<br>+57 ± 23<br>P = 0.03                  | 08:00: 231 ± 12<br>13:00: 336 ± 55<br>+107 ± 48<br>P = 0.05                 | P = 0.27<br>P = 0.96<br><br>P = 0.31               |
| Epinephrine (pg/mL)       | 08:00: 19.5 ± 3.1<br>13:00: 21.8 ± 4.3<br>+3.9 ± 5.5<br>P = 0.58            | 08:00: 20.1 ± 3.9<br>13:00: 20.6 ± 4.4<br>-0.3 ± 3.0<br>P = 0.91            | P = 0.73<br>P = 0.78<br><br>P = 0.54               |
| Dopamine (pg/mL)          | 08:00: 13.5 ± 1.0<br>13:00: 12.5 ± 0.0<br>-1.0 ± 1.0<br>P = 0.34            | 08:00: 12.5 ± 0.0<br>13:00: 14.9 ± 1.6<br>+2.4 ± 1.6<br>P = 0.17            | P = 0.34<br>P = 0.17<br><br>P = 0.09               |
| T3, total (ng/dL)         | 08:00: 110.4 ± 7.3<br>13:00: 110.4 ± 7.0<br>-1.4 ± 1.2<br>P = 0.25          | 08:00: 115.4 ± 8.3<br>13:00: 112.7 ± 7.5<br>-2.8 ± 1.5<br>P = 0.09          | P = 0.25<br>P = 0.94<br><br>P = 0.26               |
| T4, free (ng/dL)          | 08:00: 1.14 ± 0.03<br>13:00: 1.22 ± 0.04<br>+0.06 ± 0.02<br>P = 0.01        | 08:00: 1.18 ± 0.04<br>13:00: 1.22 ± 0.04<br>+0.05 ± 0.02<br>P = 0.05        | P = 0.17<br>P = 1.00<br><br>P = 0.62               |
| TSH (μIU/mL)              | 08:00: 1.59 ± 0.24<br>13:00: 1.31 ± 0.23<br>-0.34 ± 0.11<br>P = 0.009       | 08:00: 1.98 ± 0.48<br>13:00: 1.40 ± 0.25<br>-0.58 ± 0.27<br>P = 0.05        | P = 0.19<br>P = 0.57<br><br>P = 0.17               |

| Metabolite/Hormone | Difference on Day 1 08:00 and 13:00 | Difference on Day 28 08:00 and 13:00 | P: Difference in 08:00 values<br>P: Difference in 13:00 values<br><br>P: Difference in Delta Day 1 vs. Delta Day 28 |
|--------------------|-------------------------------------|--------------------------------------|---------------------------------------------------------------------------------------------------------------------|
|                    | P value:                            | P value:                             |                                                                                                                     |

P values calculated with a paired Student's t-test. Highlighted in light yellow are metabolites/hormones that had significant changes that may be related to WAT activation. Highlighted in brown are metabolites/hormones that had significant changes that may be related to BAT activation.

# Supplemental Table 7. Blood Levels of Common Metabolites and Hormones

2 of 3

| Metabolite (units)     | Day 1                                                                 | Day 28                                                                 | Change                                    |
|------------------------|-----------------------------------------------------------------------|------------------------------------------------------------------------|-------------------------------------------|
| Total Protein (g/dL)   | 08:00: 6.61 ± 0.25<br>13:00: 7.08 ± 0.12<br>+0.27 ± 0.09<br>P = 0.01  | 08:00: 6.80 ± 0.14<br>13:00: 7.04 ± 0.12<br>+0.24 ± 0.07<br>P = 0.004  | P = 0.44<br>P = 0.61<br>P = 0.77          |
| Creatine Kinase (U/L)  | 08:00: 79.0 ± 18.4<br>13:00: 87.5 ± 19.3<br>-3.46 ± 4.50<br>P = 0.98  | 08:00: 78.8 ± 14.6<br>13:00: 71.8 ± 12.4<br>-3.15 ± 3.11<br>P = 0.33   | P = 0.99<br>P = 0.97<br>P = 0.94          |
| Growth Hormone (ng/mL) | 08:00: 1.67 ± 0.53<br>13:00: 0.61 ± 0.19<br>-1.05 ± 0.72<br>P = 0.18  | 08:00: 1.16 ± 0.71<br>13:00: 0.62 ± 0.23<br>-0.54 ± 0.62<br>P = 0.40   | P = 0.37<br>P = 0.74<br>P = 0.48          |
| Glucagon (pmol/L)      | 08:00: 24.8 ± 2.1<br>13:00: 23.9 ± 2.7<br>-1.9 ± 3.7<br>P = 0.62      | 08:00: 29.1 ± 2.5<br>13:00: 22.1 ± 2.1<br>-8.1 ± 2.7<br>P = 0.012      | P = 0.20<br>P = 0.81<br>P = 0.33          |
| Cortisol (µg/dL)       | 08:00: 13.6 ± 1.3<br>13:00: 7.6 ± 0.9<br>-6.0 ± 1.0<br>P < 0.001      | 08:00: 13.1 ± 1.3<br>13:00: 7.0 ± 0.7<br>-6.1 ± 1.4<br>P = 0.001       | P = 0.61<br>P = 0.29<br>P = 0.94          |
| ACTH (pg/mL)           | 08:00: 22.9 ± 4.9<br>13:00: 14.9 ± 1.1<br>-8.0 ± 4.4<br>P = 0.09      | 08:00: 26.1 ± 4.2<br>13:00: 15.2 ± 1.7<br>-11.0 ± 3.9<br>P = 0.02      | P = 0.55<br>P = 0.82<br>P = 0.61          |
| PTH (pg/mL)            | 08:00: 36.5 ± 3.0<br>13:00: 39.3 ± 3.0<br>+2.7 ± 1.6<br>P = 0.11      | 08:00: 35.3 ± 2.9<br>13:00: 38.1 ± 3.4<br>+2.9 ± 2.1<br>P = 0.20       | P = 0.55<br>P = 0.54<br>P = 0.95          |
| aGhrelin (pg/mL)       | 08:00: 234 ± 45<br>13:00: 237 ± 47<br>+3.9 ± 28.2<br>P = 0.89         | 08:00: 316 ± 55<br>13:00: 414 ± 118<br>+98 ± 105<br>P = 0.37           | P = 0.07<br>P = 0.11<br>P = 0.44          |
| Leptin (ng/mL)         | 08:00: 15.1 ± 2.1<br>13:00: 12.1 ± 1.6<br>-3.0 ± 0.9<br>P = 0.004     | 08:00: 17.2 ± 2.3<br>13:00: 13.1 ± 2.0<br>-4.1 ± 0.6<br>P < 0.001      | P = 0.07<br>P = 0.34<br>P = 0.21          |
| Adiponectin (µg/mL)    | 08:00: 8.56 ± 1.16<br>13:00: 9.19 ± 1.27<br>+0.63 ± 0.23<br>P = 0.02  | 08:00: 11.56 ± 1.57<br>13:00: 11.81 ± 1.57<br>+0.25 ± 0.17<br>P = 0.18 | <b>P = 0.001</b><br>P = 0.001<br>P = 0.07 |
| FGF21 (pg/mL)          | 08:00: 701 ± 186<br>13:00: 842 ± 336<br>+141 ± 176<br>P = 0.44        | 08:00: 819 ± 234<br>13:00: 524 ± 161<br>-295 ± 98<br>P = 0.01          | P = 0.15<br>P = 0.12<br>P = 0.06          |
| PYY (pg/mL)            | 08:00: 54.6 ± 7.1<br>13:00: 27.4 ± 3.2<br>-27.1 ± 5.2<br>P < 0.001    | 08:00: 59.2 ± 8.9<br>13:00: 30.8 ± 3.3<br>-28.4 ± 6.8<br>P = 0.001     | P = 0.58<br>P = 0.17<br>P = 0.86          |
| aGLP-1 (pg/mL)         | 08:00: 1.35 ± 0.21<br>13:00: 0.51 ± 0.06<br>-0.84 ± 0.21<br>P = 0.001 | 08:00: 1.67 ± 0.29<br>13:00: 0.71 ± 0.10<br>-0.96 ± 0.25<br>P = 0.002  | P = 0.22<br>P = 0.05<br>P = 0.64          |

| Metabolite/Hormone | Difference on Day 1 08:00 and 13:00 | Difference on Day 28 08:00 and 13:00 | P: Difference in 08:00 values<br>P: Difference in 13:00 values<br>P: Difference in Delta Day 1 vs. Delta Day 28 |
|--------------------|-------------------------------------|--------------------------------------|-----------------------------------------------------------------------------------------------------------------|
|                    | P value:                            | P value:                             |                                                                                                                 |

P values calculated with a paired Student's t-test. Highlighted in light yellow are metabolites/hormones that had significant changes that may be related to WAT activation. Highlighted in brown are metabolites/hormones that had significant changes that may be related to BAT activation.



# Supplemental Table 8. Blood Levels of Common Metabolites and Hormones

3 of 3

| Metabolite (units)        | Day 1                                                                | Day 28                                                                | Change                             |
|---------------------------|----------------------------------------------------------------------|-----------------------------------------------------------------------|------------------------------------|
| aGIP (pg/mL)              | 08:00: 9.08 ± 1.68<br>13:00: 6.51 ± 0.89<br>-2.57 ± 1.75<br>P = 0.16 | 08:00: 13.91 ± 2.99<br>13:00: 8.14 ± 1.55<br>-5.76 ± 3.37<br>P = 0.11 | P = 0.07<br>P = 0.30<br>P = 0.34   |
| tGIP (pg/mL)              | 08:00: 34.2 ± 4.2<br>13:00: 25.2 ± 2.6<br>-9.0 ± 2.7<br>P = 0.005    | 08:00: 44.8 ± 5.5<br>13:00: 27.3 ± 3.1<br>-17.5 ± 5.7<br>P = 0.009    | P = 0.03<br>P = 0.42<br>P = 0.12   |
| Total Cholesterol (mg/dL) | 08:00: 162.8 ± 7.5<br>13:00: 166.1 ± 7.4<br>+3.3 ± 4.3<br>P = 0.46   | 08:00: 169.4 ± 8.0<br>13:00: 167.0 ± 8.3<br>-2.4 ± 4.2<br>P = 0.58    | P = 0.11<br>P = 0.88<br>P = 0.27   |
| Triglycerides (mg/dL)     | 08:00: 87.3 ± 7.3<br>13:00: 90.5 ± 8.8<br>+3.2 ± 3.9<br>P = 0.43     | 08:00: 86.0 ± 7.9<br>13:00: 81.9 ± 9.2<br>-4.4 ± 3.5<br>P = 0.23      | P = 0.72<br>P = 0.08<br>P = 0.01   |
| HDL-C (mg/dL)             | 08:00: 63.6 ± 5.6<br>13:00: 63.3 ± 5.0<br>-0.3 ± 1.7<br>P = 0.87     | 08:00: 69.0 ± 5.9<br>13:00: 67.9 ± 6.0<br>-1.0 ± 1.7<br>P = 0.56      | P = 0.001<br>P = 0.02<br>P = 0.70  |
| ApoA1 (µg/mL)             | 08:00: 965 ± 93<br>13:00: 1012 ± 90<br>+48 ± 36<br>P = 0.21          | 08:00: 1075 ± 110<br>13:00: 1126 ± 117<br>+51 ± 29<br>P = 0.10        | P = 0.02<br>P = 0.03<br>P = 0.95   |
| ApoE (µg/mL)              | 08:00: 78.1 ± 14.9<br>13:00: 85.4 ± 16.6<br>+7.3 ± 2.0<br>P = 0.003  | 08:00: 83.5 ± 15.8<br>13:00: 86.4 ± 15.7<br>+2.9 ± 2.6<br>P = 0.28    | P = 0.03<br>P = 0.76<br>P = 0.18   |
| LDL-C (mg/dL)             | 08:00: 81.7 ± 5.1<br>13:00: 84.7 ± 5.8<br>3.0 ± 2.4<br>P = 0.23      | 08:00: 83.2 ± 5.5<br>13:00: 82.7 ± 5.5<br>-0.5 ± 2.5<br>P = 0.83      | P = 0.66<br>P = 0.63<br>P = 0.27   |
| ApoB100 (µg/mL)           | 08:00: 64.4 ± 3.5<br>13:00: 67.4 ± 3.5<br>+3.0 ± 1.2<br>P = 0.03     | 08:00: 61.5 ± 3.7<br>13:00: 64.2 ± 3.3<br>+2.7 ± 0.7<br>P = 0.002     | P = 0.09<br>P = 0.05<br>P = 0.77   |
| ApoB100/ApoA1 (ug/mL)     | 08:00: 1.42 ± 0.22<br>13:00: 1.40 ± 0.21<br>-0.02 ± 0.06<br>P = 0.75 | 08:00: 1.20 ± 0.18<br>13:00: 1.23 ± 0.20<br>+0.03 ± 0.05<br>P = 0.62  | P = 0.003<br>P = 0.008<br>P = 0.63 |
| ApoC3 (µg/mL)             | 08:00: 243 ± 23<br>13:00: 248 ± 25<br>+6 ± 8<br>P = 0.52             | 08:00: 268 ± 22<br>13:00: 270 ± 22<br>+2 ± 10<br>P = 0.82             | P = 0.09<br>P = 0.15<br>P = 0.77   |

| Metabolite/Hormone | Difference on Day 1 08:00 and 13:00<br><br>P value: | Difference on Day 28 08:00 and 13:00<br><br>P value: | P: Difference in 08:00 values<br>P: Difference in 13:00 values<br><br>P: Difference in Delta Day 1 vs. Delta Day 28 |
|--------------------|-----------------------------------------------------|------------------------------------------------------|---------------------------------------------------------------------------------------------------------------------|
|--------------------|-----------------------------------------------------|------------------------------------------------------|---------------------------------------------------------------------------------------------------------------------|

P values calculated with a paired Student's t-test. Highlighted in light yellow are metabolites/hormones that had significant changes that may be related to WAT activation. Highlighted in brown are metabolites/hormones that had significant changes that may be related to BAT activation.

## Supplemental Table 9. Parameters of the Frequently-Sampled Intravenous Glucose Tolerance Test

| Parameter        | Unit                                  | Day 0              | Day 27             | Change    | <i>P</i> value <sup>A</sup> |
|------------------|---------------------------------------|--------------------|--------------------|-----------|-----------------------------|
| Glucose AUC      | mg dL <sup>-1</sup> min               | 18952 ± 316        | 15518 ± 256        | -3434     | 0.11                        |
| Insulin AUC      | mIU L <sup>-1</sup> min               | 6190 ± 497         | 5908 ± 744         | -282      | 0.16                        |
| S <sub>G</sub>   | min <sup>-1</sup>                     | 1.84E-02 ± 0.2E-02 | 2.50E-02 ± 0.2E-02 | +6.62E-03 | 0.002                       |
| S <sub>I</sub>   | mIU <sup>-1</sup> L min <sup>-1</sup> | 3.33 ± 0.27        | 4.47 ± 0.46        | +1.14     | 0.026                       |
| AIR <sub>G</sub> | mIU L <sup>-1</sup> min               | 655 ± 106          | 896 ± 158          | +241      | 0.039                       |
| DI               |                                       | 1995 ± 302         | 3626 ± 596         | +1631     | 0.005                       |
| K <sub>G</sub>   | min <sup>-1</sup>                     | 1.86 ± 0.18        | 2.70 ± 0.42        | +0.84     | 0.036                       |
| GB               | mg dL <sup>-1</sup>                   | 87.2 ± 1.8         | 88.2 ± 1.1         | +1.0      | 0.60                        |
| IB               | mIU L <sup>-1</sup>                   | 8.06 ± 0.82        | 8.45 ± 0.91        | +0.39     | 0.68                        |
| P(2)             | min <sup>-1</sup>                     | 6.96E-02 ± 0.4E-02 | 6.90E-02 ± 0.4E-02 | -6.68E-04 | 0.87                        |
| P(3)             | mIU L <sup>-1</sup> min <sup>-2</sup> | 2.34E-05 ± 0.3E-05 | 3.15E-05 ± 0.4E-05 | +8.1E-06  | 0.052                       |
| G(0)             | mg dL <sup>-1</sup>                   | 257 ± 8            | 299 ± 13           | +42       | 0.002                       |
| GEZI             | min <sup>-1</sup>                     | 1.58E-02 ± 0.2E-03 | 2.14E-02 ± 0.2E-03 | +5.63E-03 | 0.005                       |
| HOMA β-cell      | mIU mM <sup>-1</sup>                  | 122.6 ± 10.6       | 122.9 ± 14.5       | +0.3      | 0.98                        |
| HOMA IR          | mM mU L <sup>-2</sup>                 | 1.75 ± 0.20        | 1.84 ± 0.20        | +0.09     | 0.72                        |

### Abbreviations:

AUC = Area under the curve

S<sub>G</sub> = Glucose effectiveness

S<sub>I</sub> = Insulin secretion index

AIR<sub>G</sub> = Acute insulin response to glucose

DI = Disposition Index

K<sub>G</sub> = Glucose disappearance rate, 10-20 min after injection of glucose

GB = Basal glucose concentration

IB = Basal insulin concentration

P(2) = Rate constant describing a spontaneous decrease of tissue glucose uptake ability

P(3) = Insulin-dependent increase in tissue glucose uptake ability per unit of insulin concentration access over baseline

G(0) = Initial glucose concentration

GEZI = Glucose effectiveness at zero insulin

HOMA = Homeostatic model

<sup>A</sup>*P* value based on paired Student's *t*-test

**Supplemental Table 10. BARCIST Criteria (from Table 1 of Chen KY et al. Cell Metab. 2016;24): 210–222.)**

| <b>Participant Characteristics</b>                          | <b>Recommendation</b>                                                                                                                                                                        | <b>Location in manuscript</b>                                                                                                                                                    |
|-------------------------------------------------------------|----------------------------------------------------------------------------------------------------------------------------------------------------------------------------------------------|----------------------------------------------------------------------------------------------------------------------------------------------------------------------------------|
| Age, sex, ethnicity/race, height, weight, BMI               | Report                                                                                                                                                                                       | Table 1                                                                                                                                                                          |
| Lean (fat free) and fat body mass                           | Report (including method of determination)                                                                                                                                                   | Table 1                                                                                                                                                                          |
| Prescription and over counter medications                   | Report                                                                                                                                                                                       | Described here:<br><a href="https://clinicaltrials.gov/ct2/show/NCT03049462">https://clinicaltrials.gov/ct2/show/NCT03049462</a>                                                 |
| β-blockers, β-adrenergic agonists                           | Exclusion criterion                                                                                                                                                                          |                                                                                                                                                                                  |
| Weight change of >5% within 3 months                        | Exclusion criterion<br>(if weight change prior to the study is expected as part of the study design, consider using dynamic PET/CT FDG or the use of another tracer in combination with FDG) |                                                                                                                                                                                  |
| Habitual tobacco use                                        | Exclusion criterion                                                                                                                                                                          |                                                                                                                                                                                  |
| Habitual excessive alcohol use                              | Exclusion criterion                                                                                                                                                                          |                                                                                                                                                                                  |
| Menstrual cycle phase, hormone replacement therapy use      | Report<br>Recommend that participants be studied at same phase if possible                                                                                                                   |                                                                                                                                                                                  |
| Pregnancy                                                   | Exclusion criterion                                                                                                                                                                          |                                                                                                                                                                                  |
| Plasma Glucose                                              | Exclude or control if >11mM                                                                                                                                                                  |                                                                                                                                                                                  |
| <b>Subject Preparation</b>                                  |                                                                                                                                                                                              |                                                                                                                                                                                  |
| <b>Subject Preparation</b>                                  | <b>Recommendation</b>                                                                                                                                                                        | <b>Location in manuscript</b>                                                                                                                                                    |
| Meals 24 hours before scan                                  | Avoid high fat foods                                                                                                                                                                         | Described in the Supplemental Methods section, headings “Metabolic Testing: Day 0 & Day 27” and “Quantification of Metabolic Activity, Physiological, and Clinical Measurements” |
| Caffeine 24 hours before scan                               | Not recommended                                                                                                                                                                              |                                                                                                                                                                                  |
| Fast duration before scan                                   | >6 hours                                                                                                                                                                                     |                                                                                                                                                                                  |
| Pharmaceuticals                                             | Report                                                                                                                                                                                       |                                                                                                                                                                                  |
| Fasting plasma glucose (within 3 hours of tracer injection) | Report<br>Should be <7mM. Do not proceed with experiment if >11mM                                                                                                                            |                                                                                                                                                                                  |
| Strenuous activity within 48 hours of scan                  | Not recommended                                                                                                                                                                              |                                                                                                                                                                                  |
| Clothing during scan                                        | Report thermal “R” insulation value (CLO)<br>Examples of acceptable clothing: hospital gown, scrubs, tee shirt and shorts                                                                    |                                                                                                                                                                                  |
| Environmental (room) temperature                            | Report if subject was exposed to cool temperatures within 12 hours of cooling period or scan                                                                                                 |                                                                                                                                                                                  |

**Supplemental Table 11. BARCIST Criteria (from Table 1 of Chen KY et al. Cell Metab. 2016;24): 210–222.)**

| BAT Activation / Cooling Protocol                | Recommendation                                                                                                                                                                                                                                              | Location in manuscript                                                                |
|--------------------------------------------------|-------------------------------------------------------------------------------------------------------------------------------------------------------------------------------------------------------------------------------------------------------------|---------------------------------------------------------------------------------------|
| Fixed or personalized cooling paradigm           | Report<br>Recommend personalized paradigm if the study population is heterogeneous or if an intervention is used that is expected to change BAT volume or activation potential. Exposure conditions should be the same for repeated tests on a participant. | Not applicable as the BAT activation was done pharmacologically via 100 mg mirabegron |
| Cooling device                                   | Report<br>Recommend room air; water in cooling vest, suit, or blanket                                                                                                                                                                                       |                                                                                       |
| Air or Coolant temperature at shivering (if any) | Report<br>Room air or water in cooling vest, suit, or blanket.                                                                                                                                                                                              |                                                                                       |
| Coolant temperature during cool period           | Report both room air temperature and water temperature in cooling device, if used                                                                                                                                                                           |                                                                                       |
| Total duration at cool temperature               | Report<br>Recommend minimum of 60 min. (after any incidence of shivering) prior to injection and ~60 min. after injection (until scan)                                                                                                                      |                                                                                       |
| Warm temperature (if applicable)                 | Report                                                                                                                                                                                                                                                      |                                                                                       |
| Duration at warm temperature (if applicable)     | Report                                                                                                                                                                                                                                                      |                                                                                       |
| Method used to monitor skin temperature          | Recommend surface temperature probes at multiple sites for continuous recordings.                                                                                                                                                                           |                                                                                       |
| Method used to monitor shivering                 | Report<br>Recommend EMG, observation, and/or self-report (in order of decreasing preference)<br>Shivering should be minimized for 60 min. before and after tracer injection.                                                                                |                                                                                       |

**Supplemental Table 12. BARCIST Criteria (from Table 1 of Chen KY et al. Cell Metab. 2016;24): 210–222.)**

| PET/CT Examination                                                                                 | Recommendation                                                                                                                                                                                              | Location in manuscript                                                                                                                                                                                                                                    |
|----------------------------------------------------------------------------------------------------|-------------------------------------------------------------------------------------------------------------------------------------------------------------------------------------------------------------|-----------------------------------------------------------------------------------------------------------------------------------------------------------------------------------------------------------------------------------------------------------|
| Manufacturer, model of PET/CT machine                                                              | Report<br>Recommend using the same scanner for all scans within a study, especially for test/re-test in same participant                                                                                    | The methods used to quantify BAT metabolic activity and volume are described on lines 326-333. Additional details can be found in Leitner et al. {Leitner 2017}, and a step-by-step visual demonstration of the technique is described in Kim et al (58). |
| Data acquisition                                                                                   | Methods should be consistent with UPICT, QIBA and/or EANM standards.                                                                                                                                        |                                                                                                                                                                                                                                                           |
| Reconstruction algorithms, reconstruction parameters and reconstruction software version used      | Report<br>Record software version number if possible, and recommend using the same software version for all images within a study                                                                           |                                                                                                                                                                                                                                                           |
| FDG dose, site of injection                                                                        | Report<br>Recommend using a dose as low as possible for statistically valid imaging, with consideration for total dosage in repeat studies.                                                                 | Peripheral iv, 185 MBq/5mCi                                                                                                                                                                                                                               |
| Method used to normalize FDG dose                                                                  | Report<br>Recommend using lean (fat free) body mass, Measured directly via densitometry, DEXA, or other validated method. If no direct measure is available, it can be estimated with Janmahasatian Formula | Lean body mass measured via DXA                                                                                                                                                                                                                           |
| Time between FDG injection and PET/CT scan (at cold temperature if cooling is used)                | Report<br>Recommend target 60 minutes with 55–70 minutes range                                                                                                                                              | 75-85 minutes                                                                                                                                                                                                                                             |
| Time of day for scan                                                                               | Report using 24-hour notation<br>Recommend that all scans within a study be done at approximately the same time of day, if possible                                                                         | 14:15-14:25                                                                                                                                                                                                                                               |
| Geographic location, time of year, outdoor temperature range                                       | Report (latitude and longitude)<br>For longitudinal interventional studies, recommend completing all scans within a single season or using an appropriate control group                                     | Bethesda, MD, USA<br>All times of year (Supplemental Fig.9)                                                                                                                                                                                               |
| Volume of water intake between injection and scan                                                  | Report<br>Recommend drinking water be lukewarm such that participant perceives no difference between water and room temperature                                                                             | Not recorded                                                                                                                                                                                                                                              |
| Duration of PET scan                                                                               | Report<br>Recommend less than 60 min                                                                                                                                                                        | 20 minutes, 5 minutes for each of 4 bed positions                                                                                                                                                                                                         |
| PET acquired voxel sizes and Field of View                                                         | Report<br>Recommend that PET FOV to include the base of skull through inferior margin of liver, if possible                                                                                                 | <ul style="list-style-type: none"> <li>•PET/CT images were reconstructed into image voxels of 1.45 × 1.45 × 1.5 mm for PET and of 0.98 × 0.98 × 1.5 mm for CT</li> <li>•120 kVp, 115 mA</li> </ul>                                                        |
| CT scan parameters, including kVp, acquired voxel sizes, tube power and Kv used, and Field of View | Report<br>Recommend kVp = 120 ± 10<br>Recommend excluding pelvis to minimize radiation dose                                                                                                                 |                                                                                                                                                                                                                                                           |
| Extent and Duration of CT scan                                                                     | Recommend base of skull to umbilicus, or as small as possible for study                                                                                                                                     | <90 seconds                                                                                                                                                                                                                                               |

**Supplemental Table 13. BARCIST Criteria (from Table 1 of Chen KY et al. Cell Metab. 2016;24): 210–222.)**

| Data Analysis and Report                                               | Recommendation                                                                                                                                                                                                                                                                                                                                                                                                                                                                                                                                                                                                                                                                                                                                                                                            | Location in manuscript                                                                                                                                           |
|------------------------------------------------------------------------|-----------------------------------------------------------------------------------------------------------------------------------------------------------------------------------------------------------------------------------------------------------------------------------------------------------------------------------------------------------------------------------------------------------------------------------------------------------------------------------------------------------------------------------------------------------------------------------------------------------------------------------------------------------------------------------------------------------------------------------------------------------------------------------------------------------|------------------------------------------------------------------------------------------------------------------------------------------------------------------|
| SUV and CT radiodensity scales                                         | Continuous intensity scales should be used. SUV should be reported to 2 decimal places                                                                                                                                                                                                                                                                                                                                                                                                                                                                                                                                                                                                                                                                                                                    | Data are reported this way in Fig. 2 and Supplemental Figs. 2,3,5                                                                                                |
| SUV normalization                                                      | Recommend using lean (fat free) body mass to calculate $SUV_{lean}$ (measured directly (i.e., DEXA). If no direct measure is available, can be estimated using Janmahasatian Formulation)                                                                                                                                                                                                                                                                                                                                                                                                                                                                                                                                                                                                                 |                                                                                                                                                                  |
| Minimum BAT metabolic activity threshold for calculation of BAT volume | $SUV_{lean} \geq 1.2$<br>If only the $SUV_{bm}$ is available, convert to $SUV_{bm} \geq 1.2 / (LBM/BM)$ . (This approximates $SUV_{lean} \geq 1.2$ for lean young men of 20% body fat). Use measured LBM; if not available, use population-estimated LBM.                                                                                                                                                                                                                                                                                                                                                                                                                                                                                                                                                 | $SUV_{LBM} \geq (1.2g/mL) / (LBM\%)$                                                                                                                             |
| Hounsfield Unit range used to define adipose tissue (WAT and BAT)      | Report<br>Recommend $-190$ to $-10$ for all fat (WAT + BAT). VOI should not include obvious non-fat tissues within this range such as lung                                                                                                                                                                                                                                                                                                                                                                                                                                                                                                                                                                                                                                                                | Range was $-300$ to $-10$ HU                                                                                                                                     |
| BAT metabolic activity                                                 | Report $SUV_{bm/max}$ for the hottest single voxel in a VOI within BAT region, and $SUV_{bm/mean}$ for all voxels within BAT region.<br>Report $SUV_{lean/max}$ for the hottest voxel within BAT region and $SUV_{lean/mean}$ for all voxels within BAT region.<br>Report $SUV_{bm/peak}$ and $SUV_{lean/peak}$ for the hottest VOI within BAT region, for comparison between studies as this parameter is expected to vary less than $SUV_{max}$ .<br>Recommend reporting up to six VOI (hottest VOI in left and right supraclavicular region, left and right neck, left and right mediastinal)                                                                                                                                                                                                          | BAT metabolic activity was determined and reported this way in Fig. 2 and Supplemental Figs. 1-5                                                                 |
| BAT metabolic volume (BMV)                                             | At a minimum, report BAT metabolic volume as the sum of all voxel volumes within suspected BAT region where $SUV_{bm} \geq 1.5$ and HU is between $-190$ and $-10$ .<br>It is recommended that a correction be made for body composition. Therefore, BMV should also be reported in one of two additional ways:<br>• a) the sum of all voxel volumes within suspected BAT region where $SUV_{lean} \geq 1.2$ and HU is between $-190$ and $-10$ or<br>• b) the sum of all voxel volumes within suspected BAT region where $SUV_{bm} \geq 1.2 / (LBM/BM)$ and HU is between $-190$ and $-10$ .<br>Option b) is suggested for obese participants, although has not been validated. If a fixed volume or 'mantle' is used, describe the procedure for selecting it, as well as the volume size and location. | BAT metabolic volume was reported for all voxel volumes where $SUV_{LBM} \geq (1.2 g/mL)/(LBM\%)$ where HU was between $-300$ and $-10$ . It is shown if Fig. 2. |
| Reference tissue                                                       | Report reference tissue if used. To facilitate comparison among studies, recommend reporting mean normal tissue SUV in blood (descending aorta), 3 cm sphere in right lobe of liver (per PERCIST), and cerebellum if included in field of view.                                                                                                                                                                                                                                                                                                                                                                                                                                                                                                                                                           | No reference tissue was used.                                                                                                                                    |
| Other data analysis as needed to assess experimental outcomes          | Report                                                                                                                                                                                                                                                                                                                                                                                                                                                                                                                                                                                                                                                                                                                                                                                                    | Not applicable                                                                                                                                                   |

# Supplemental Figure 1

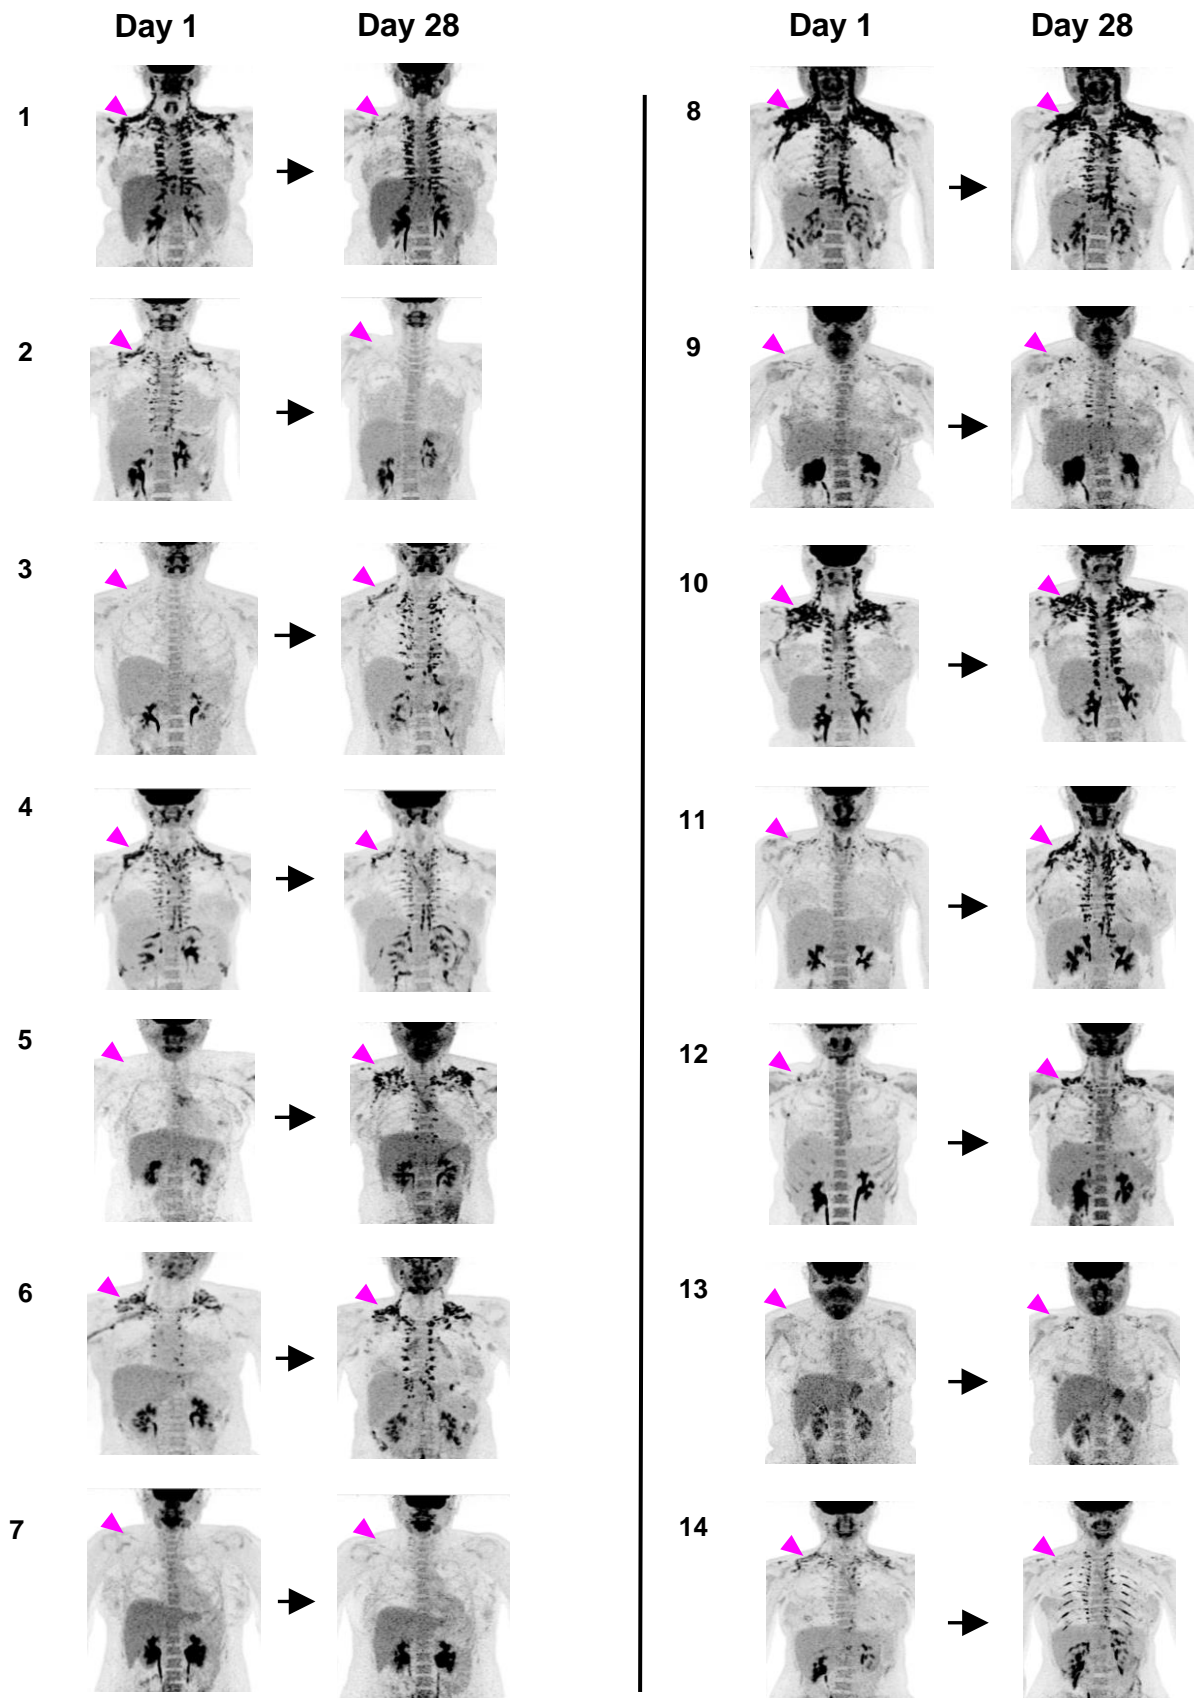

**Supplemental Figure 1. Tissue glucose uptake in response to mirabegron after acute and chronic exposure.** Shown are individual PET scans indicating  $^{18}\text{F}$ -FDG uptake when given mirabegron on Day 1 (left) and on Day 28 (right). Magenta arrowheads point to the region of supraclavicular BAT.

# Supplemental Figure 2

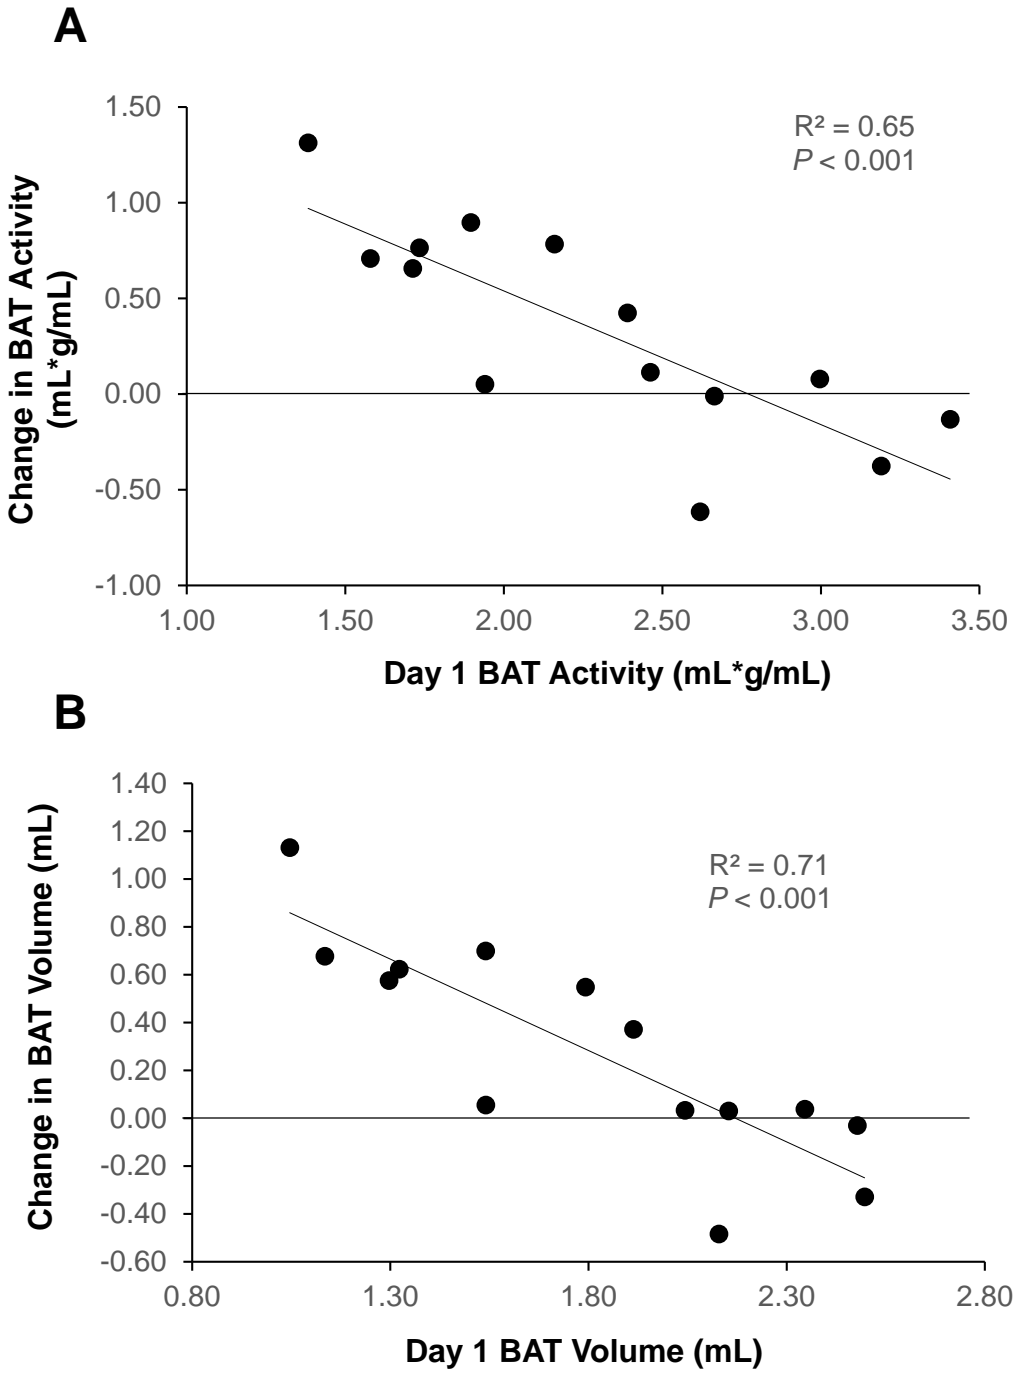

**Supplemental Figure 2. Changes in BAT metabolic activity and volume as a function of Day 1 values.** Change in detectable BAT (A) metabolic activity and (B) volume in subjects between Day 28 and Day 1 compared with initial values on Day 1. n=14.



# Supplemental Figure 3

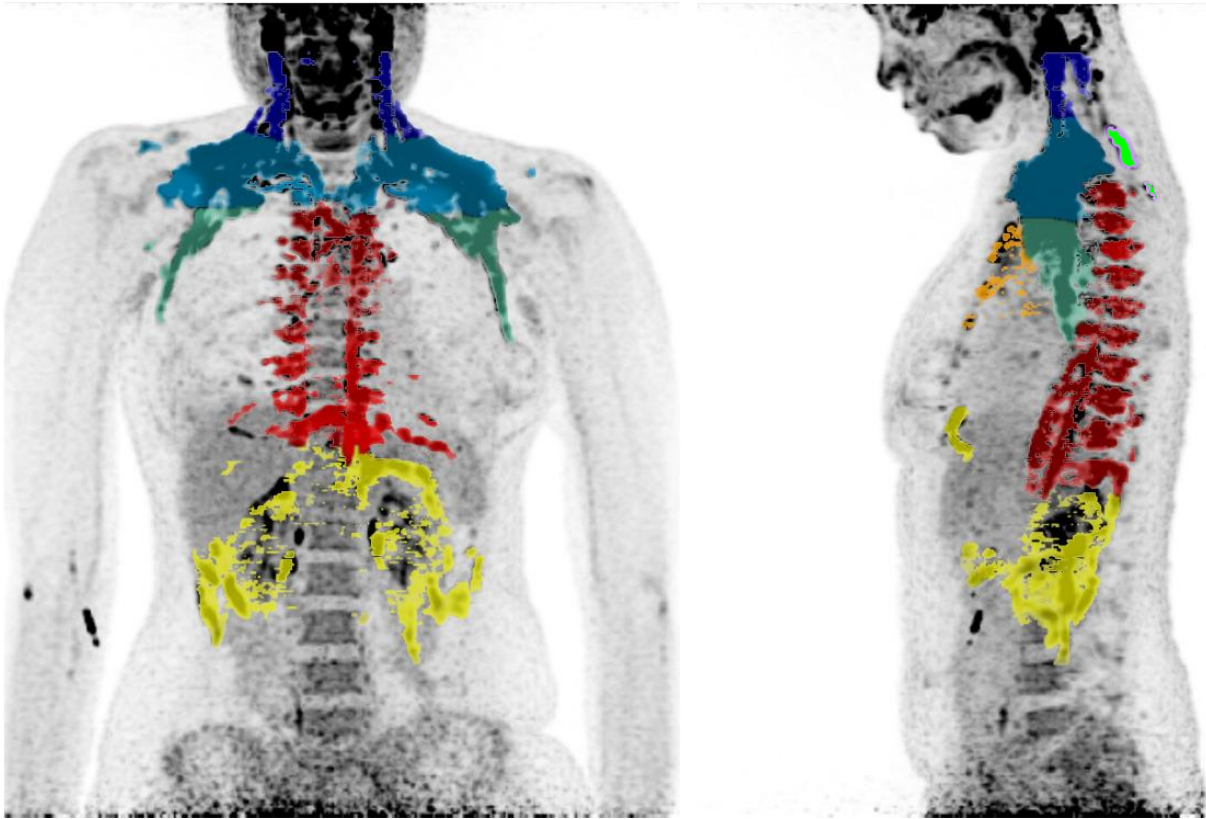

- Cervical
- Dorsocervical
- Supraclavicular
- Axillary
- Paraspinal
- Mediastinal
- Abdominal

**Supplemental Figure 3: BAT Depots.** Depiction of seven BAT depots in a representative subject. Coronal view (left) sagittal view (right).

# Supplemental Figure 4

## A

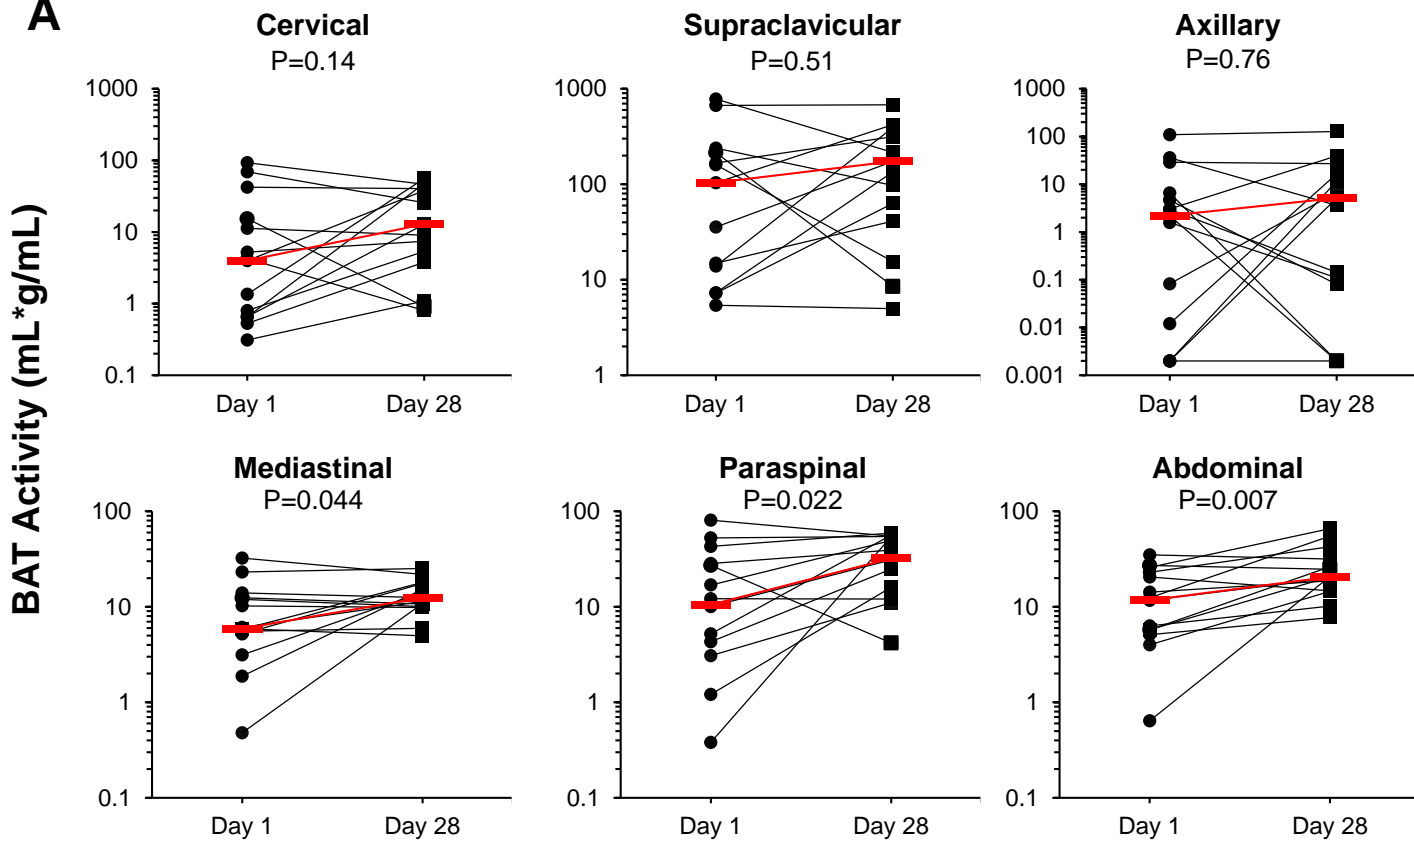

## B

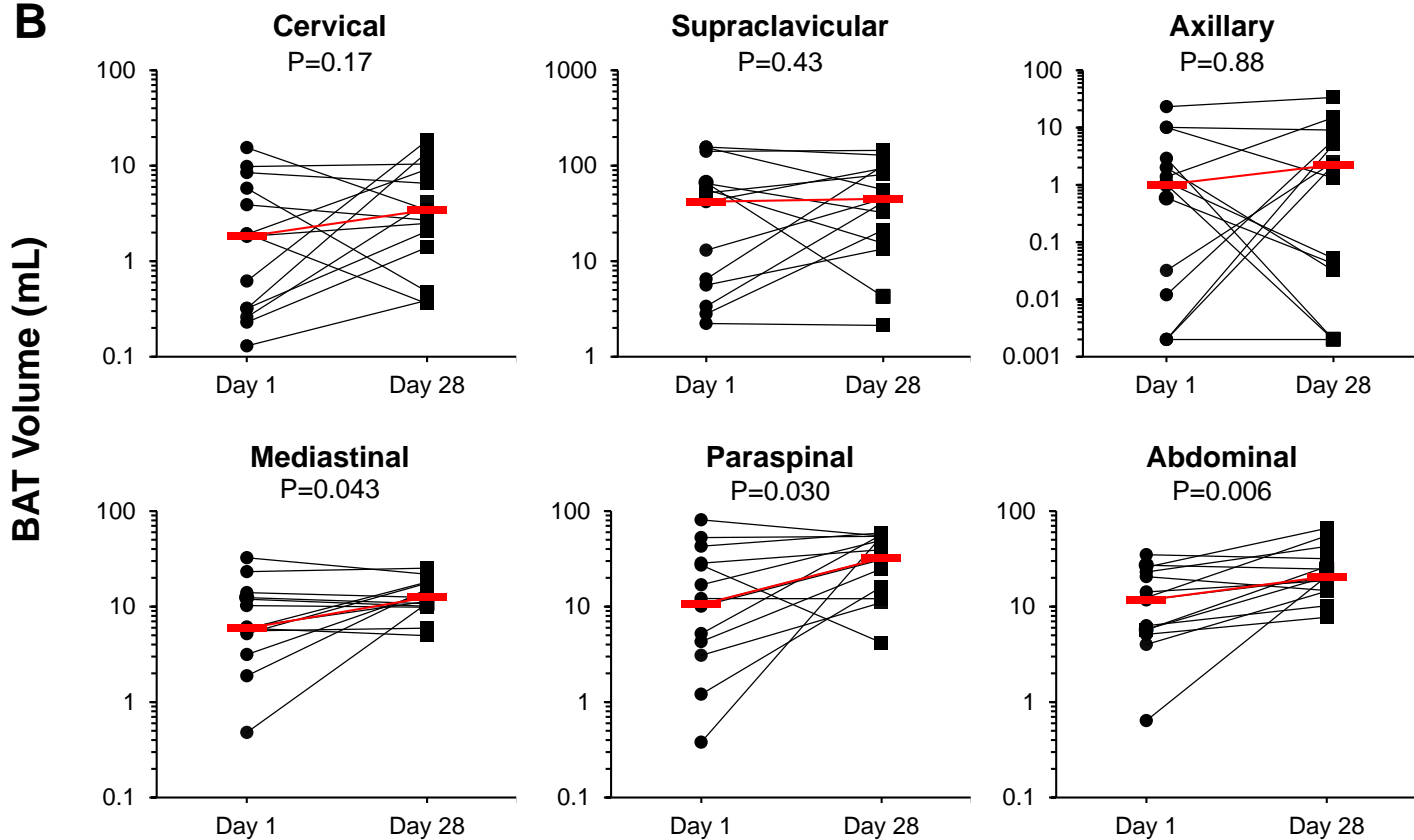

**Supplemental Figure 4: Changes in BAT metabolic activity and volume across depots.** Individual depot changes in (A) BAT metabolic activity and (B) BAT volume in each of the six principal anatomical depots. Individual measures are Day 1 (black circles) and Day 28 (black squares). Red bars represent group medians. *P* values were determined via paired Student's *t*-test on log transformed data. *n*=14.

# Supplemental Figure 5

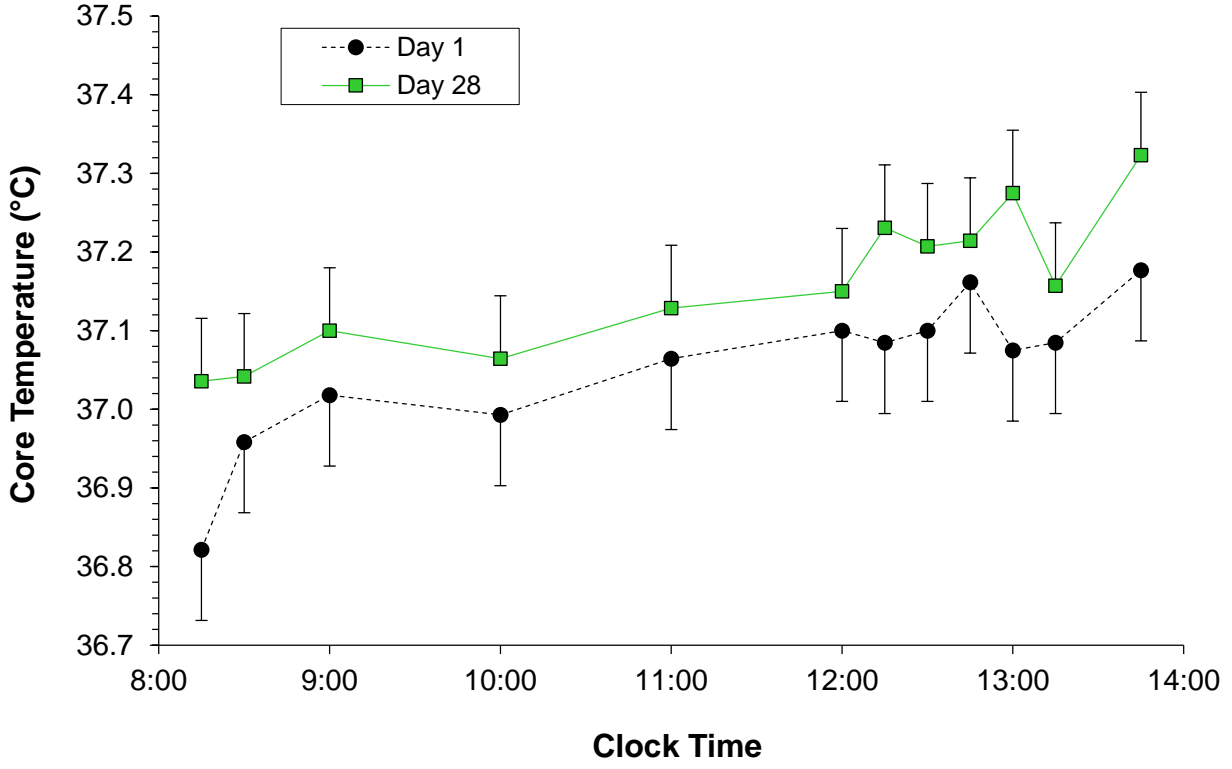

| Predictors of Core Temperature (Units) | P Value |
|----------------------------------------|---------|
| Day of Study, 1 vs 28                  | <0.001  |
| Time of Day                            | <0.001  |
| Day of Study*Time of Day               | 0.79    |

**Supplemental Figure 5. Core Body Temperature.** Subjects' mean core body temperature, measured via tympanic thermometer, while in the chamber on Day 1 (black circles) and Day 28 (green squares), error bars represent SEM. The effects of Day of Study, Time of Day, and their interaction were assessed using a linear mixed model, n=14.

# Supplemental Figure 6

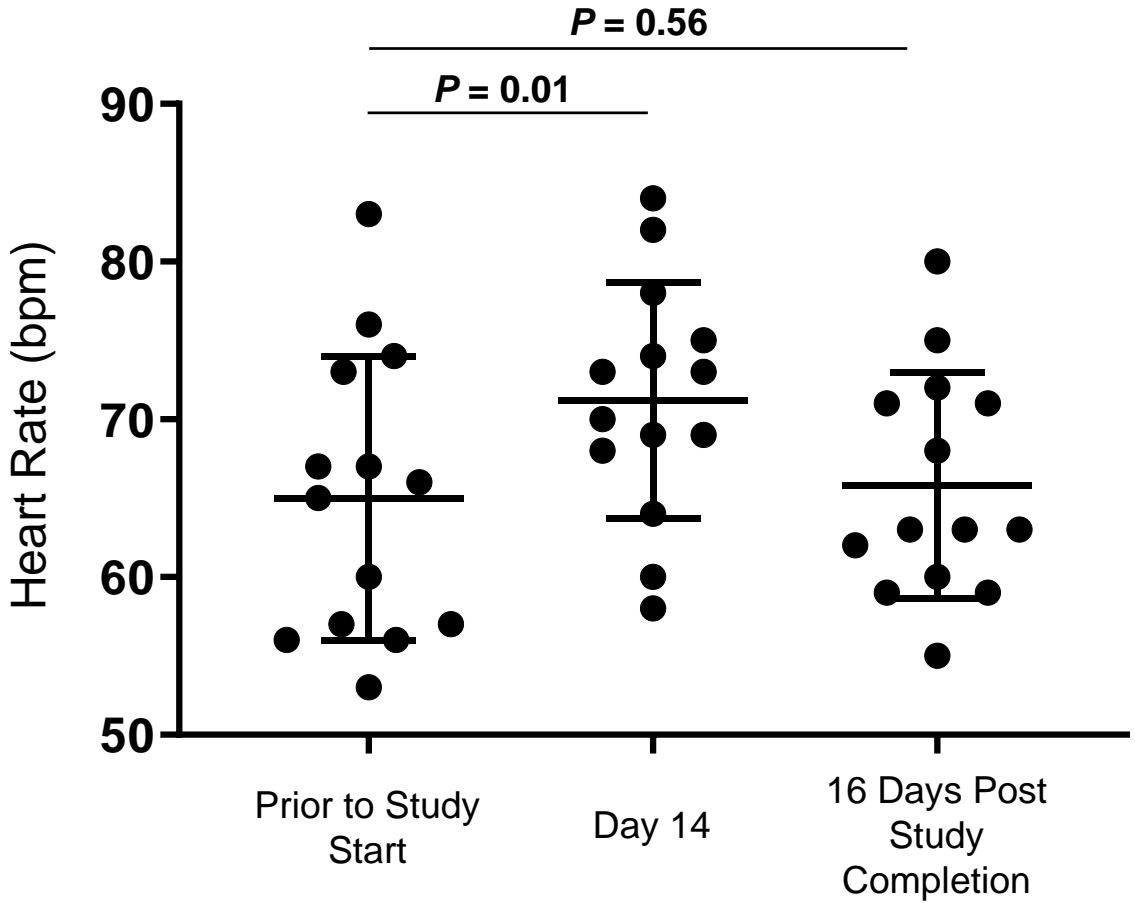

**Supplemental Figure 6. Changes in heart rate.** Heart rate, measured via electrocardiogram, at screening, interim (Day 14), and follow-up, which was 16 days after study completion and cessation of daily mirabegron dosing. *P* values were determined via paired Student's *t*-test. *n*=14.

# Supplemental Figure 7

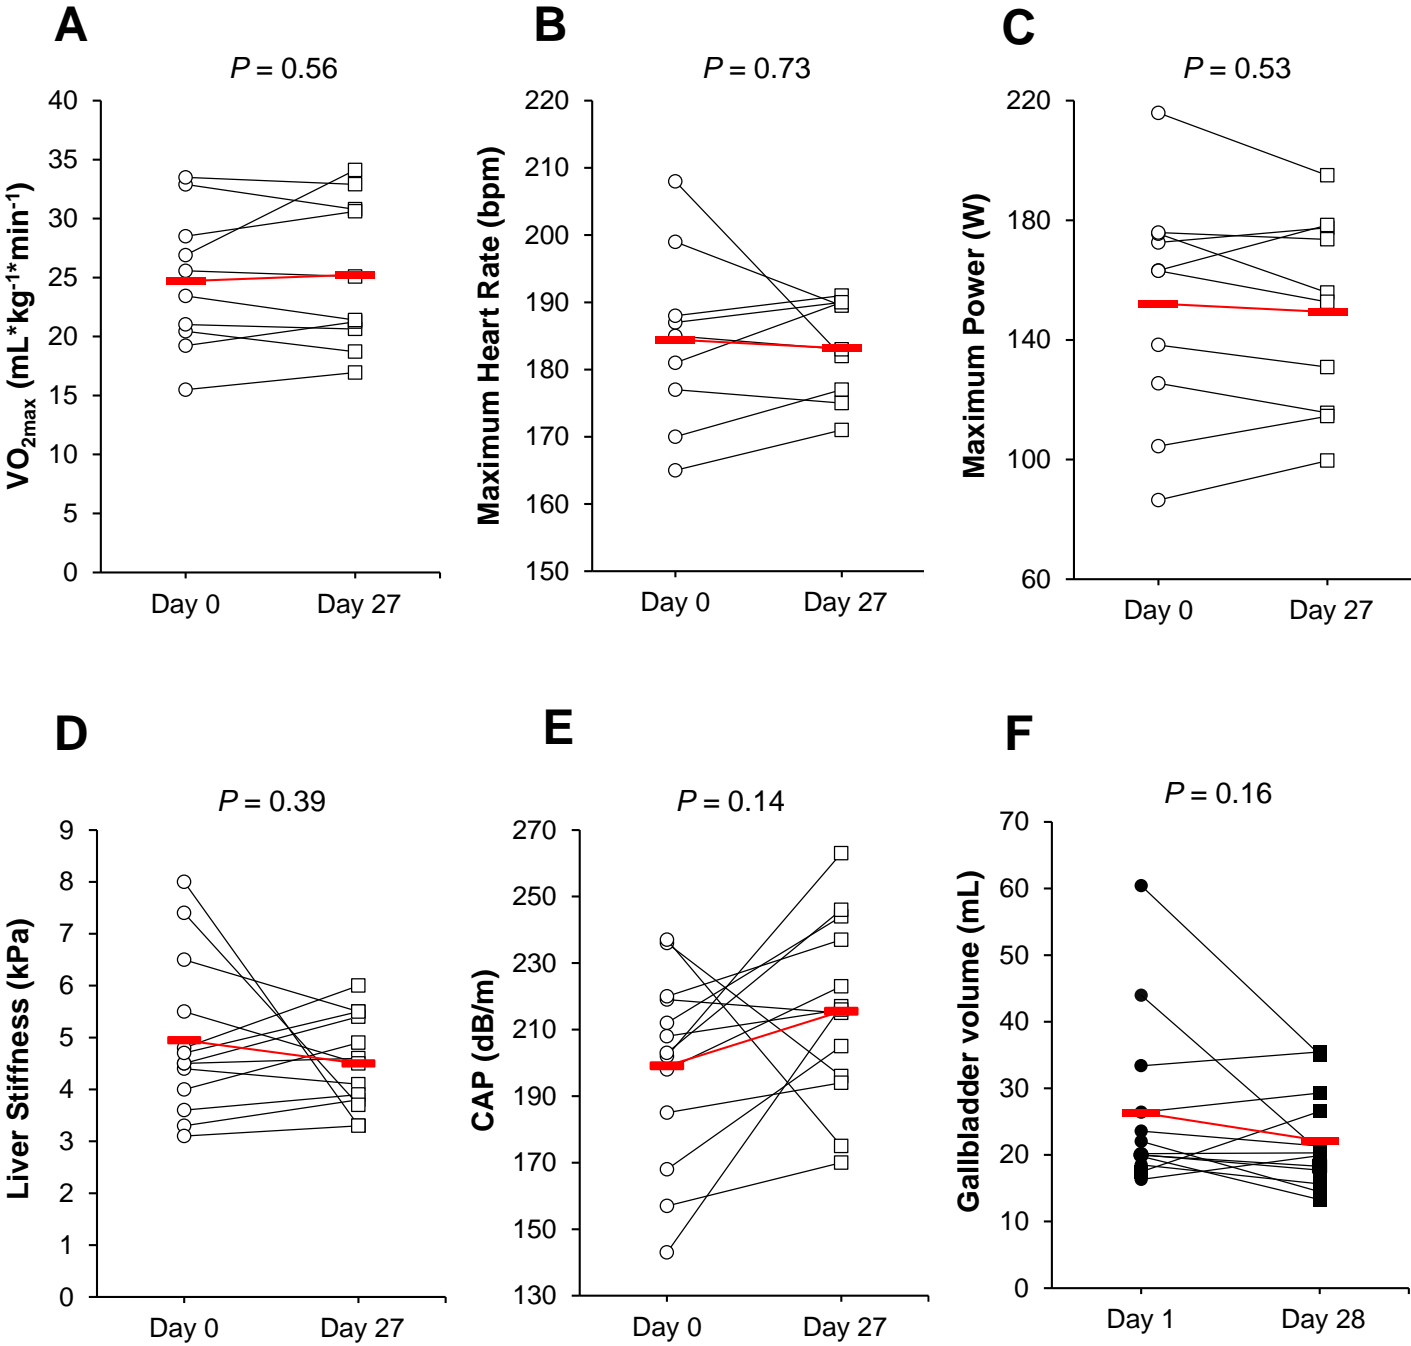

**Supplemental Figure 7. Changes in exercise tolerance, liver parameters, and gallbladder size.** Maximum (A)  $VO_{2max}$ , (B) heart rate, and (C) power achieved during maximal exercise tolerance test. Vibration controlled transient elastography assessment of (D) liver stiffness and (E) controlled attenuation parameter (CAP) for liver steatosis. (F) Individual gallbladder volume measured from CT scans. Symbols were used as follows: Day 0 measurements (white circles); Day 1 measurements (black circles); Day 27 measurements (white squares), Day 28 measurements (black squares). Red bars represent group means.  $P$  values were determined via paired Student's t-test.  $n=9-14$ .

# Supplemental Figure 8

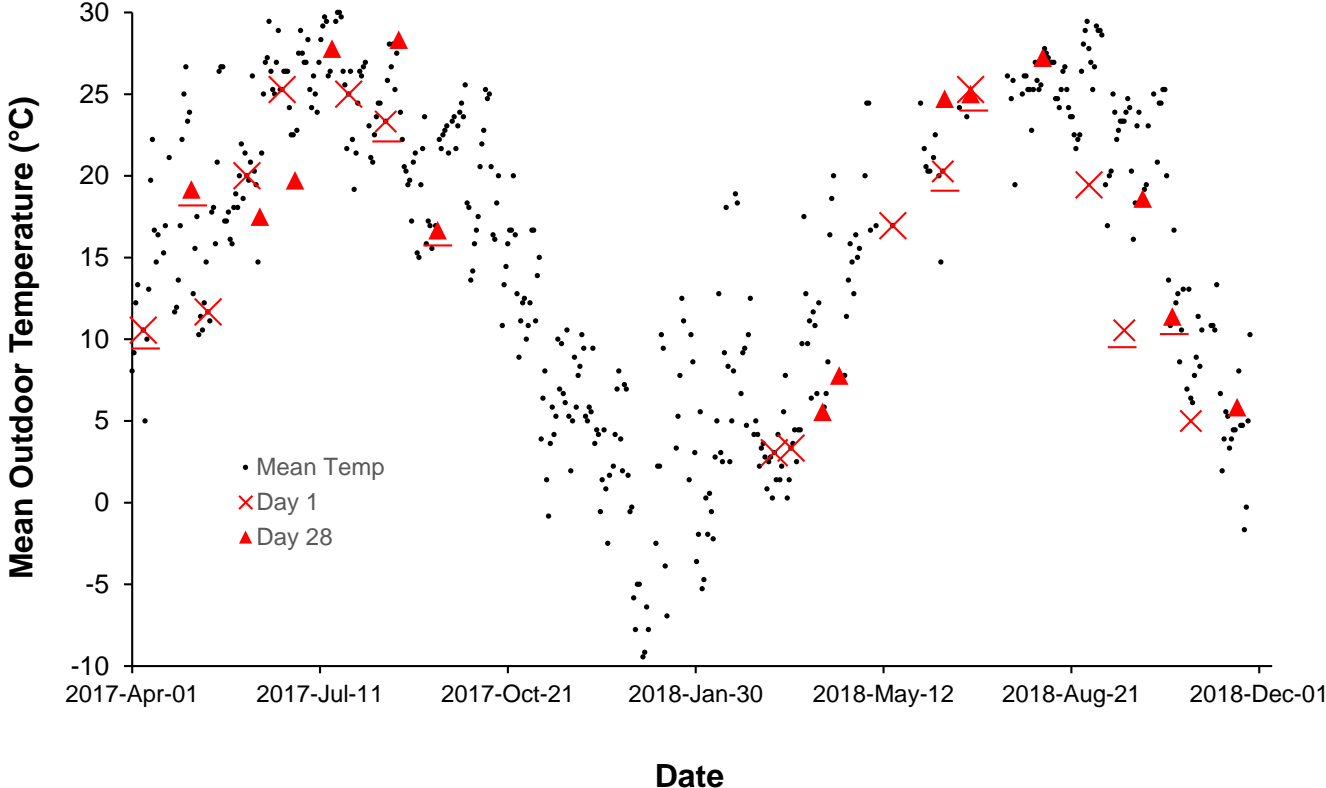

**Supplemental Figure 8. Mean Outdoor Temperature in Bethesda, MD** The mean outdoor temperatures over the course of the clinical trial are shown as black circles. The subjects' Day 1 study days are red "X" marks, and the Day 28 study days are red triangles. n=14. The symbols for the four subjects who traveled out of the area during their mirabegron treatment are underlined in red.

## TREND Statement Checklist

| Paper Section/<br>Topic                                             | Item No | Descriptor                                                                                                                                     | Reported?                                                                           |       |
|---------------------------------------------------------------------|---------|------------------------------------------------------------------------------------------------------------------------------------------------|-------------------------------------------------------------------------------------|-------|
|                                                                     |         |                                                                                                                                                |  | Pg #  |
| <b>Title and Abstract</b>                                           |         |                                                                                                                                                |                                                                                     |       |
| Title and Abstract                                                  | 1       | • Information on how unit were allocated to interventions                                                                                      | X                                                                                   | 3     |
|                                                                     |         | • Structured abstract recommended                                                                                                              | X                                                                                   | 3     |
|                                                                     |         | • Information on target population or study sample                                                                                             | X                                                                                   | 3     |
| <b>Introduction</b>                                                 |         |                                                                                                                                                |                                                                                     |       |
| Background                                                          | 2       | • Scientific background and explanation of rationale                                                                                           | X                                                                                   | 5     |
|                                                                     |         | • Theories used in designing behavioral interventions                                                                                          | X                                                                                   | 5     |
| <b>Methods</b>                                                      |         |                                                                                                                                                |                                                                                     |       |
| Participants                                                        | 3       | • Eligibility criteria for participants, including criteria at different levels in recruitment/sampling plan (e.g., cities, clinics, subjects) | X                                                                                   | 16-17 |
|                                                                     |         | • Method of recruitment (e.g., referral, self-selection), including the sampling method if a systematic sampling plan was implemented          | X                                                                                   | 16-17 |
|                                                                     |         | • Recruitment setting                                                                                                                          | X                                                                                   | 16    |
|                                                                     |         | • Settings and locations where the data were collected                                                                                         | X                                                                                   | 17-23 |
| Interventions                                                       | 4       | • Details of the interventions intended for each study condition and how and when they were actually administered, specifically including:     |                                                                                     |       |
|                                                                     |         | ○ Content: what was given?                                                                                                                     | X                                                                                   | 17-20 |
|                                                                     |         | ○ Delivery method: how was the content given?                                                                                                  | X                                                                                   | 17-20 |
|                                                                     |         | ○ Unit of delivery: how were the subjects grouped during delivery?                                                                             | X                                                                                   | 17-20 |
|                                                                     |         | ○ Deliverer: who delivered the intervention?                                                                                                   | X                                                                                   | 17-20 |
|                                                                     |         | ○ Setting: where was the intervention delivered?                                                                                               | X                                                                                   | 17-20 |
|                                                                     |         | ○ Exposure quantity and duration: how many sessions or episodes or events were intended to be delivered? How long were they intended to last?  | X                                                                                   | 17-20 |
|                                                                     |         | ○ Time span: how long was it intended to take to deliver the intervention to each unit?                                                        | X                                                                                   | 17-20 |
| ○ Activities to increase compliance or adherence (e.g., incentives) | n/a     |                                                                                                                                                |                                                                                     |       |
| Objectives                                                          | 5       | • Specific objectives and hypotheses                                                                                                           | X                                                                                   | 16    |
| Outcomes                                                            | 6       | • Clearly defined primary and secondary outcome measures                                                                                       | X                                                                                   | 16    |
|                                                                     |         | • Methods used to collect data and any methods used to enhance the quality of measurements                                                     | X                                                                                   | 16-23 |
|                                                                     |         | • Information on validated instruments such as psychometric and biometric properties                                                           | X                                                                                   | 17-23 |
| Sample Size                                                         | 7       | • How sample size was determined and, when applicable, explanation of any interim analyses and stopping rules                                  | X                                                                                   | 16    |
| Assignment Method                                                   | 8       | • Unit of assignment (the unit being assigned to study condition, e.g., individual, group, community)                                          | X                                                                                   | 16-17 |
|                                                                     |         | • Method used to assign units to study conditions, including details of any restriction (e.g., blocking, stratification, minimization)         | X                                                                                   | 16-17 |
|                                                                     |         | • Inclusion of aspects employed to help minimize potential bias induced due to non-randomization (e.g., matching)                              | X                                                                                   | 17    |

## TREND Statement Checklist

|                      |    |                                                                                                                                                                                                                                                                                          |     |       |
|----------------------|----|------------------------------------------------------------------------------------------------------------------------------------------------------------------------------------------------------------------------------------------------------------------------------------------|-----|-------|
| Blinding (masking)   | 9  | <ul style="list-style-type: none"> <li>Whether or not participants, those administering the interventions, and those assessing the outcomes were blinded to study condition assignment; if so, statement regarding how the blinding was accomplished and how it was assessed.</li> </ul> | X   | 16    |
| Unit of Analysis     | 10 | <ul style="list-style-type: none"> <li>Description of the smallest unit that is being analyzed to assess intervention effects (e.g., individual, group, or community)</li> </ul>                                                                                                         | X   | 16-17 |
|                      |    | <ul style="list-style-type: none"> <li>If the unit of analysis differs from the unit of assignment, the analytical method used to account for this (e.g., adjusting the standard error estimates by the design effect or using multilevel analysis)</li> </ul>                           | n/a |       |
| Statistical Methods  | 11 | <ul style="list-style-type: none"> <li>Statistical methods used to compare study groups for primary methods outcome(s), including complex methods of correlated data</li> </ul>                                                                                                          | X   | 23    |
|                      |    | <ul style="list-style-type: none"> <li>Statistical methods used for additional analyses, such as a subgroup analyses and adjusted analysis</li> </ul>                                                                                                                                    | X   | 23    |
|                      |    | <ul style="list-style-type: none"> <li>Methods for imputing missing data, if used</li> </ul>                                                                                                                                                                                             | n/a |       |
|                      |    | <ul style="list-style-type: none"> <li>Statistical software or programs used</li> </ul>                                                                                                                                                                                                  | X   | 23    |
| <b>Results</b>       |    |                                                                                                                                                                                                                                                                                          |     |       |
| Participant flow     | 12 | <ul style="list-style-type: none"> <li>Flow of participants through each stage of the study: enrollment, assignment, allocation, and intervention exposure, follow-up, analysis (a diagram is strongly recommended)</li> </ul>                                                           | X   | 17-20 |
|                      |    | <ul style="list-style-type: none"> <li> <ul style="list-style-type: none"> <li>Enrollment: the numbers of participants screened for eligibility, found to be eligible or not eligible, declined to be enrolled, and enrolled in the study</li> </ul> </li> </ul>                         | X   | 17    |
|                      |    | <ul style="list-style-type: none"> <li> <ul style="list-style-type: none"> <li>Assignment: the numbers of participants assigned to a study condition</li> </ul> </li> </ul>                                                                                                              | n/a |       |
|                      |    | <ul style="list-style-type: none"> <li> <ul style="list-style-type: none"> <li>Allocation and intervention exposure: the number of participants assigned to each study condition and the number of participants who received each intervention</li> </ul> </li> </ul>                    | n/a |       |
|                      |    | <ul style="list-style-type: none"> <li> <ul style="list-style-type: none"> <li>Follow-up: the number of participants who completed the follow-up or did not complete the follow-up (i.e., lost to follow-up), by study condition</li> </ul> </li> </ul>                                  | X   | 17    |
|                      |    | <ul style="list-style-type: none"> <li> <ul style="list-style-type: none"> <li>Analysis: the number of participants included in or excluded from the main analysis, by study condition</li> </ul> </li> </ul>                                                                            | X   |       |
|                      |    | <ul style="list-style-type: none"> <li>Description of protocol deviations from study as planned, along with reasons</li> </ul>                                                                                                                                                           | n/a |       |
| Recruitment          | 13 | <ul style="list-style-type: none"> <li>Dates defining the periods of recruitment and follow-up</li> </ul>                                                                                                                                                                                | X   | 17    |
| Baseline Data        | 14 | <ul style="list-style-type: none"> <li>Baseline demographic and clinical characteristics of participants in each study condition</li> </ul>                                                                                                                                              | X   | 6-11  |
|                      |    | <ul style="list-style-type: none"> <li>Baseline characteristics for each study condition relevant to specific disease prevention research</li> </ul>                                                                                                                                     | n/a |       |
|                      |    | <ul style="list-style-type: none"> <li>Baseline comparisons of those lost to follow-up and those retained, overall and by study condition</li> </ul>                                                                                                                                     | n/a |       |
|                      |    | <ul style="list-style-type: none"> <li>Comparison between study population at baseline and target population of interest</li> </ul>                                                                                                                                                      | n/a |       |
| Baseline equivalence | 15 | <ul style="list-style-type: none"> <li>Data on study group equivalence at baseline and statistical methods used to control for baseline differences</li> </ul>                                                                                                                           | n/a |       |



## TREND Statement Checklist

|                         |    |                                                                                                                                                                                                                                                                                                                                |     |                |
|-------------------------|----|--------------------------------------------------------------------------------------------------------------------------------------------------------------------------------------------------------------------------------------------------------------------------------------------------------------------------------|-----|----------------|
| Numbers analyzed        | 16 | <ul style="list-style-type: none"> <li>Number of participants (denominator) included in each analysis for each study condition, particularly when the denominators change for different outcomes; statement of the results in absolute numbers when feasible</li> </ul>                                                        | X   | 16-23<br>33-36 |
|                         |    | <ul style="list-style-type: none"> <li>Indication of whether the analysis strategy was “intention to treat” or, if not, description of how non-compliers were treated in the analyses</li> </ul>                                                                                                                               | n/a |                |
| Outcomes and estimation | 17 | <ul style="list-style-type: none"> <li>For each primary and secondary outcome, a summary of results for each estimation study condition, and the estimated effect size and a confidence interval to indicate the precision</li> </ul>                                                                                          | X   | 6-11           |
|                         |    | <ul style="list-style-type: none"> <li>Inclusion of null and negative findings</li> </ul>                                                                                                                                                                                                                                      | X   | 6-11           |
|                         |    | <ul style="list-style-type: none"> <li>Inclusion of results from testing pre-specified causal pathways through which the intervention was intended to operate, if any</li> </ul>                                                                                                                                               | n/a |                |
| Ancillary analyses      | 18 | <ul style="list-style-type: none"> <li>Summary of other analyses performed, including subgroup or restricted analyses, indicating which are pre-specified or exploratory</li> </ul>                                                                                                                                            | X   | 6-11           |
| Adverse events          | 19 | <ul style="list-style-type: none"> <li>Summary of all important adverse events or unintended effects in each study condition (including summary measures, effect size estimates, and confidence intervals)</li> </ul>                                                                                                          | X   | 9              |
| <b>DISCUSSION</b>       |    |                                                                                                                                                                                                                                                                                                                                |     |                |
| Interpretation          | 20 | <ul style="list-style-type: none"> <li>Interpretation of the results, taking into account study hypotheses, sources of potential bias, imprecision of measures, multiplicative analyses, and other limitations or weaknesses of the study</li> </ul>                                                                           | X   | 12-15          |
|                         |    | <ul style="list-style-type: none"> <li>Discussion of results taking into account the mechanism by which the intervention was intended to work (causal pathways) or alternative mechanisms or explanations</li> </ul>                                                                                                           | X   | 12-15          |
|                         |    | <ul style="list-style-type: none"> <li>Discussion of the success of and barriers to implementing the intervention, fidelity of implementation</li> </ul>                                                                                                                                                                       | X   | 12-15          |
|                         |    | <ul style="list-style-type: none"> <li>Discussion of research, programmatic, or policy implications</li> </ul>                                                                                                                                                                                                                 | X   | 12-15          |
| Generalizability        | 21 | <ul style="list-style-type: none"> <li>Generalizability (external validity) of the trial findings, taking into account the study population, the characteristics of the intervention, length of follow-up, incentives, compliance rates, specific sites/settings involved in the study, and other contextual issues</li> </ul> | X   | 12-15          |
| Overall Evidence        | 22 | <ul style="list-style-type: none"> <li>General interpretation of the results in the context of current evidence and current theory</li> </ul>                                                                                                                                                                                  | X   | 12-15          |

From: Des Jarlais, D. C., Lyles, C., Crepaz, N., & the Trend Group (2004). Improving the reporting quality of nonrandomized evaluations of behavioral and public health interventions: The TREND statement. *American Journal of Public Health*, 94, 361-366. For more information, visit: <http://www.cdc.gov/trendstatement/>
